1 **Short title**

2 AI-enabled QTL mapping of stomatal patterning

3

4 **Corresponding Author**

5 Andrew D.B. Leakey, [leakey@illinois.edu](mailto:leakey@illinois.edu)

6

7 **Article title**

8 Optical topometry and machine learning to rapidly phenotype stomatal patterning  
9 traits for QTL mapping in maize<sup>1</sup>

10

11 **All author names and affiliations**

12 Jiayang Xie, Dustin Mayfield-Jones, Gorka Erice<sup>†</sup>, Min Choi, Andrew D.B. Leakey\*

13

14 Department of Crop Sciences (J.X., A.D.B.L.), Carl R. Woese Institute for Genomic  
15 Biology (J.X., D.M-J., G.E., M.C., A.D.B.L.), Department of Plant Biology (D.M-J.,  
16 A.D.B.L.), Center for Digital Agriculture (D.M-J., A.D.B.L) University of Illinois at  
17 Urbana-Champaign, Urbana IL 61801 U.S.A.

18

19 ORCHID ID: 0000-0001-6251-024X (A.D.B.L.), 0000-0002-3043-4550 (J.X.),  
20 0000-0002-2949-7044 (D.M-J.), 0000-0001-5429-9624 (G.E.)

21

22 **One sentence summary**

23 Optical topometry and machine learning tools were developed to assess epidermal cell  
24 patterning, and applied to analyze its genetic architecture alongside leaf  
25 photosynthetic gas exchange in maize.

26

27 The author responsible for distribution of materials integral to the findings presented  
28 in this article in accordance with the policy described in the Instructions for Authors  
29 ([www.plantphysiol.org](http://www.plantphysiol.org)) is: Andrew D.B. Leakey ([leakey@illinois.edu](mailto:leakey@illinois.edu)).

30

31 A.D.B.L. and J.X. conceived of and designed the original research plans; J.X.  
32 performed the experiments; G.E. developed data collection methods and performed  
33 preliminary genotype screening; M.C. provided technical assistance; J.X. and D.M-J.  
34 conceived and developed the machine learning pipeline; J.X. and A.D.B.L. analyzed  
35 the data; J.X., D.M-J. and A.D.B.L. wrote the article with contributions from all of the  
36 authors; A.D.B.L. agrees to serve as the author responsible for contact and ensures  
37 communication.

38

39 <sup>1</sup> This work was supported by the National Science Foundation (grant no. PGR–  
40 1238030), the University of Illinois Center for Digital Agriculture, and a Foundation  
41 for Food and Agriculture Research Graduate Student Fellowship (to J.X.).

42

43 \* Address correspondence to [leakey@illinois.edu](mailto:leakey@illinois.edu)

44 <sup>†</sup> Present address: Agrotecnologías Naturales S.L., 43762 Tarragona, Spain.

45 **Abstract**

46 Stomata are adjustable pores on leaf surfaces that regulate the trade-off of CO<sub>2</sub> uptake  
47 with water vapor loss, thus having critical roles in controlling photosynthetic carbon  
48 gain and plant water use. The lack of easy, rapid methods for phenotyping epidermal  
49 cell traits have limited the use of quantitative, forward and reverse genetics to  
50 discover the genetic basis of stomatal patterning. A new high-throughput epidermal  
51 cell phenotyping pipeline is presented here and used for quantitative trait loci (QTL)  
52 mapping in field-grown maize. The locations and sizes of stomatal complexes and  
53 pavement cells on images acquired by an optical topometer from mature leaves were  
54 automatically determined. Computer estimated stomatal complex density (SCD;  $R^2 =$   
55  $0.97$ ) and stomatal complex area (SCA;  $R^2 = 0.71$ ) were strongly correlated with  
56 human measurements. Leaf gas exchange traits correlated with the dimensions and  
57 proportion of stomatal complexes but, unexpectedly, did not correlate with SCD.  
58 Genetic variation in epidermal traits were consistent across two field seasons. Out of  
59 143 QTLs in total, 36 QTLs were consistently identified for a given trait in both years.  
60 24 hotspots of overlapping QTLs for multiple traits were identified. Orthologs of  
61 genes known to regulate stomatal patterning in *Arabidopsis* were located within some,  
62 but not all, of these regions. This study demonstrates how discovery of the genetic  
63 basis for stomatal patterning can be accelerated in maize, a model for C<sub>4</sub> species  
64 where these processes are poorly understood.

65

66 **INTRODUCTION**

67 Stomata are the adjustable pores on leaf surfaces that regulate gas exchange, most  
68 notably CO<sub>2</sub> uptake and water vapor loss. The ratio of carbon gained to water lost is  
69 defined as water use efficiency (WUE), and represents arguably the most fundamental  
70 trade-off faced by land plants (Leakey et al., 2019). The pattern of stomata on the  
71 epidermis, and the dynamics of stomatal opening and closing, influence many  
72 important processes from food and energy production to global carbon and water  
73 cycling (Hetherington and Woodward, 2003). The accessibility of stomata on the plant  
74 exterior surface has also made them a model system for studying developmental and  
75 signaling processes (Blatt, 2000; Schroeder et al., 2001; Bergmann, 2004; Lawson et  
76 al., 2014; Torii, 2015). Consequently, there is significant potential for fundamental  
77 scientific discoveries about stomata to be leveraged for improvement of crop  
78 performance and sustainability through breeding or biotechnology (Yoo et al., 2010;  
79 Franks et al., 2015; Hughes et al., 2017; Caine et al., 2019; Lawson and Vialet-  
80 Chabrand, 2019; Harrison et al., 2020; McKown and Bergmann, 2020).

81 Despite the accessibility and importance of stomata, assessing the patterning of  
82 epidermal cells has remained a laborious and time-consuming task for many decades.  
83 Most studies of stomatal patterning still rely on methods of imprinting or peeling the  
84 epidermis from live tissue, followed by light microscopy, and manual identification  
85 and measurement of cells in images (e.g. Biscoe, 1872; Caine et al., 2019; Vófély et  
86 al., 2019). This limits the application of quantitative, forward and reverse genetics to  
87 understand the genes and processes that regulate stomatal patterning. And, it means

88 samples cannot be analyzed with sufficient throughput for stomatal patterning to be a  
89 target trait in modern crop breeding programs.

90 Optical topometry (OT) is a rare example of a new methodology proposed to  
91 accelerate the acquisition of epidermal patterning data through rapid image  
92 acquisition. OT is a non-destructive method for use on fresh or frozen leaf samples,  
93 which requires no sample preparation beyond sticking a piece of leaf to a microscope  
94 slide with double-sided sticky tape (Haus et al., 2015). It gathers focused pixels across  
95 plains of the leaf surface in less than one minute per field of view. OT images have  
96 been manually counted to assess stomatal density responses to elevated [CO<sub>2</sub>] in  
97 *Arabidopsis* (Haus et al., 2018). But, an automated analysis pipeline is still needed to  
98 robustly capture within-species genetic variation in epidermal patterning from OT  
99 images with the fidelity required for genetic analysis.

100 There have been many attempts to address the phenotyping bottleneck for  
101 stomatal patterning through computer-aided image analysis. Classical image  
102 processing methods (Omasa and Onoe, 1984; Liu et al., 2016; Duarte et al., 2017) and  
103 machine learning models have been applied (Violet-Chabrand and Brendel, 2014;  
104 Higaki et al., 2015; Jayakody et al., 2017; Saponaro et al., 2017; Dittberner et al.,  
105 2018; Toda et al., 2018; Bhugra et al., 2019; Sakoda et al., 2019; Aono et al., 2019;  
106 Fetter et al., 2019; Li et al., 2019). While a number of these methods have been  
107 demonstrated to work within constrained image sets, none of them have been widely  
108 adopted, even within a single species. Some of these tools require scanning electron  
109 microscopy (SEM), adding to the sample preparation and image acquisition burden  
110 (Aono et al., 2019; Bhugra et al., 2019; Fetter et al., 2019). Most existing tools are  
111 limited to identifying and phenotyping stomatal complexes. Adding the ability to  
112 measure pavement cells is valuable in its own right and also allows calculation of  
113 stomatal index (SI; i.e. the ratio of stomata number to all epidermal cell number given  
114 in unit leaf area). SI is a key trait because it is directly influenced by mechanisms that  
115 regulate epidermal cell fate and it is less sensitive to environmental influences than  
116 stomatal density (Royer, 2001). Therefore, developing an end-to-end pipeline for  
117 rapid acquisition and comprehensive analysis of epidermal cell patterning, and  
118 demonstrating its application in investigation of genetic variation in stomatal  
119 patterning, remains an important but elusive goal.

120 In recent years, important progress has been made in studying the degree to  
121 which orthologs of stomatal patterning genes in *Arabidopsis* (Pillitteri and Torii, 2012)  
122 have conserved or novel functions in C<sub>3</sub> grass species (Raissig et al., 2016; Hughes et  
123 al., 2017; Raissig et al., 2017; Yin et al., 2017; Hepworth et al., 2018; McKown and  
124 Bergmann, 2020). But, very little is known about the trait relationships and genetic  
125 control of stomatal patterning and iWUE in C<sub>4</sub> species (Leakey et al., 2019). And, apart  
126 from a few notable examples (Cartwright et al., 2009; Campitelli et al., 2016; Raissig  
127 et al., 2017) quantitative genetics and forward genetic screens to identify putative  
128 regulators of stomatal patterning still have generally not met their potential to drive  
129 discovery of genotype-to-phenotype relationships.

130 Linkage mapping in barley, wheat, and rice has discovered QTLs that are  
131 associated with stomatal patterning traits (Patto et al., 2003; Laza et al., 2010; Liu et  
132 al., 2014; Liu et al., 2017; Sumathi et al., 2018), including some that co-localize with  
133 yield QTL (Shahinnia et al., 2016). But, the only reports of similar experiments in  
134 maize predate statistical techniques such as QTL mapping (Heichel, 1971). Maize is  
135 the most important crop in the world in terms of total production (USDA, 2019), with  
136 the Midwest U.S. producing approximately 27% of the global harvest (USDA-FAS,  
137 2020). Maize yield is limited by water availability, and increasingly sensitive to  
138 drought as a side effect of productivity increases resulting from improved breeding  
139 and management (Lobell et al., 2014). Conversely, increased maize production over  
140 recent decades has led to faster water cycling and regional cooling in Midwest U.S.  
141 (Alter et al., 2018). Therefore, improved understanding of the genetic basis for  
142 variation in stomatal traits in maize has implications for agricultural productivity,  
143 resilience and sustainability. And, maize is a highly tractable, model experimental  
144 system for crop genetics (Buckler et al., 2009).

145 In summary, the current study was motivated by the need for a tool to accelerate  
146 phenotyping of epidermal cell patterning, which could then be demonstrated by  
147 applying it to investigate the genetic architecture of stomatal patterning traits in maize.  
148 The desired characteristics of an end-to-end phenotyping pipeline are: (1) little to no  
149 sample preparation and quick image acquisition; (2) fast, accurate and robust  
150 detection of epidermal cells; and (3) the ability to extract the number, size and  
151 position of pavement cells as well as stomatal complexes. OT was tested as a data  
152 acquisition method from leaves that were stored frozen after being grown in the field.  
153 For epidermal cell detection, the recently developed Mask R-CNN model for object  
154 instance detection (He et al., 2017) was tested to treat stomata and pavement cells as  
155 two object classes, so that their position and size could be extracted simultaneously. A  
156 RIL population resulting from a B73 x MS71 cross was grown in two years in the  
157 field. Stomatal patterning was phenotyped along with leaf photosynthetic gas  
158 exchange and specific leaf area to investigate the genetic architecture of these  
159 important traits in a major crop and model  $C_4$  species.

160  
161

---

162 **RESULTS**

163 **High throughput phenotyping pipeline for epidermal cells of maize**

164 A high throughput epidermal cell detection pipeline requires both efficient image  
165 acquisition and automatic cell detection (Fig. 1). Optical topometry (OT) allowed  
166 rapid, nondestructive imaging of leaf samples. Less than 1 minute was required from  
167 locating the portion of epidermis to be scanned to outputting a 3D topography surface  
168 layer with dimensions of 0.8mm x 0.8mm (e.g. Fig. 2A). Overall, 7033 fields of view  
169 were sampled from 1569 leaf samples collected over two field seasons, with scanning  
170 being completed in approximately 24 person days. The Mask-RCNN model  
171 automatically detected stomatal complexes as well as pavement cells, even though the  
172 latter varied greatly in their physical shape and size (Fig. 2). Analysis of a full image  
173 set for QTL mapping (~4000 images) was completed in approximately 120 h (Table  
174 1).

175

176 **Human validation of MASK R-CNN cell counts and stomatal complex size**

177 Variation among 6 trained human evaluators contributed a small portion of the  
178 variance within the dataset for both SCD (2%) and pavement cell density (PD; 6%)  
179 (Fig. S3). Variation among evaluators contributed a greater proportion of variance for  
180 stomatal complex width (56 %), stomatal complex length (23 %) and stomatal  
181 complex area (15 %). Nonetheless, uncertainty around the mean value of human  
182 measurements was low (expressed as standard error around plotted data in Fig. 3, A  
183 and B). There was no variance in estimates of cell density from Mask R-CNN when  
184 the same image was repeatedly submitted to the analysis pipeline, so no measure of  
185 technical variation could be expressed.

186 The mean density of cells estimated by the group of human evaluators was very  
187 strongly correlated with computer estimation of both SCD ( $R^2 = 0.97$ ,  $p < 0.0001$ ; Fig.  
188 3A) and PD ( $R^2 = 0.96$ ,  $p < 0.0001$ ; Fig. 3B) and displayed very low bias from the 1:1  
189 line. The mean data from human evaluators were also highly significantly correlated  
190 with computer measurements for stomatal complex length (SCL;  $R^2 = 0.81$ ,  $p < 0.0001$ ;  
191 Fig. 4A), stomatal complex width (SCW;  $R^2 = 0.54$ ,  $p < 0.0001$ ; Fig. 4B) and stomatal  
192 complex area (SCA;  $R^2 = 0.71$ ,  $p < 0.0001$ ; Fig. 4C). All three traits were slightly  
193 underestimated by machine measurements relative to human measurements, with the  
194 absolute bias being greater for larger cells than small cells.

195 To further evaluate sources of variation in stomatal patterning traits, six RILs  
196 were chosen that represented the range of SCD observed across the full mapping  
197 population in the 2016 growing season. All the images for those six RILs were then  
198 manually counted by five human beings as well as by machine. Variation around the  
199 genotype means derived from machine counts was similar or smaller than the  
200 variation resulting from using the mean of five expert evaluators as the input  
201 (expressed as standard error around plotted data in Fig. 3, C and D). Genotype mean  
202 values based on machine counts were very strongly correlated with best-estimates

203 from human evaluators for both stomatal complex density ( $R^2 = 0.999$ ,  $p < 0.0001$ ; Fig.  
204 3C) and pavement cell density ( $R^2 = 0.998$ ,  $p < 0.0001$ ; Fig. 3D), and had very little  
205 bias from the 1:1 line.

206

### 207 **Genotypic variation in traits within and across years**

208 Genotypic variation in stomatal patterning traits displayed good repeatability  
209 across growing seasons (Fig. 5). Genotype means were significantly correlated across  
210 the two years for all traits assessed with goodness-of-fit ( $R^2$ ) ranked from highest to  
211 lowest of: 0.70 for SCTA; 0.69 for SPI, 0.68 for SI, 0.64 for SCD; 0.64 PA; 0.60 for  
212 PD; 0.56 for SCL; 0.52 for SCLWR; 0.50 for SCA; 0.46 for SCW; 0.43 for PTA; and  
213 0.13 for SLA.

214 Among the 198 RILs assessed over the two years, the relative range of stomatal  
215 patterning traits varied from more than 2-fold, i.e., 127% for SCD (59 to 134  $\text{mm}^{-2}$ )  
216 down to 29% for SCW (18.8 to 24.3  $\mu\text{m}$ ; Fig. S4). Specific leaf area (SLA) was  
217 significantly greater in 2017 (205 to 299  $\text{cm}^2\text{g}^{-1}$ ) compared to 2016 (139 to 220  
218  $\text{cm}^2\text{g}^{-1}$ ). In 2017, leaf photosynthetic gas exchange traits varied 2-4 fold among the  
219 192 RILs for the rate of  $\text{CO}_2$  assimilation ( $A$ ), stomatal conductance ( $g_s$ ); the ratio of  
220 intercellular  $[\text{CO}_2]$  to atmospheric  $[\text{CO}_2]$  ( $c_i/c_a$ ); and intrinsic water use efficiency  
221 ( $iWUE$ ). The ranges of all trait values significantly exceeded the trait variation  
222 between the parent lines B73 and MS71 (Fig. S4). As expected, SCD and SI were  
223 significant lower in MS71 than B73. This corresponded with greater stomatal  
224 complex size in MS71 compared to B73 in terms of SCW, SCL and SCA. SCLWR  
225 was greater in MS71 than B73. In terms of leaf gas exchange, MS71 had lower  $g_s$ ,  
226 lower  $A$ , lower  $c_i/c_a$  and greater  $iWUE$  than B73 (Fig. S4).

227

### 228 **Trait relationships**

229 Correlation matrices for genotype means of stomatal patterning traits were very  
230 similar for data collected in 2016 (Fig. S5) and 2017 (Fig. 6). Therefore, the  
231 presentation of results here will focus on data from 2017, when anatomical traits were  
232 assessed alongside leaf photosynthetic gas exchange.

233 There were numerous significant trait associations among anatomical stomatal  
234 patterning traits and also among leaf photosynthetic gas exchange traits. Genotypes  
235 with larger stomatal complexes tended to have larger pavement cells (SCA vs PA,  $r =$   
236 0.45), which resulted in a positive correlation between SCD and PD as well ( $r = 0.66$ ).  
237 SCD was negatively correlated with measures of stomatal complex size, including  
238 SCW ( $r = -0.2$ ), SCL ( $r = -0.56$ ) and SCA ( $r = -0.57$ ). As SCD increased it was  
239 associated with a significant decrease in SCLWR (i.e., rounder or less elongated  
240 stomatal complexes,  $r = -0.31$ ). But, PD was not significantly correlated with the  
241 shape of stomatal complexes, SCLWR ( $p = 0.16$ ). With the majority of the epidermis  
242 occupied by pavement cells, the trade-off between density (PD) and size (PA) was

243 even stronger than for stomatal complexes ( $r = -0.91$ ). After aggregating across the  
244 epidermis, SCTA was positively correlated with SCD ( $r = 0.82$ ) and SI ( $r = 0.69$ ) but  
245 was influenced in a mixed and weaker manner by stomatal complex size or  
246 proportions in terms of SCW ( $r = 0.19$ ), SCL ( $r = -0.16$ ), SCA ( $p = 0.88$ ) or SCLWR ( $r$   
247  $= -0.24$ ). Considering just cell identity, SI was more strongly correlated with variation  
248 in SCD ( $r = 0.62$ ) than PD ( $r = -0.19$ ). Meanwhile, there were strong positive  
249 correlations of  $g_s$  with  $A$  ( $r = 0.83$ ) and  $g_s$  with  $c_i/c_a$  ( $r = 0.88$ ). And a correspondingly  
250 strong negative correlation of  $g_s$  with  $iWUE$  and ( $r = -0.91$ ). There were weaker, but  
251 significant correlations between  $A$  and  $c_i/c_a$  ( $r = 0.59$ ) and  $A$  and  $iWUE$  ( $r = -0.59$ ).  
252 SLA was positively correlated with  $iWUE$  ( $r = 0.30$ ) while being negatively correlated  
253 with  $A$  ( $r = -0.23$ ),  $g_s$  ( $r = -0.29$ ) and  $c_i/c_a$  ( $r = -0.31$ ).

254 Examining structure-function relationships across trait categories,  $A$ ,  $g_s$ ,  $c_i/c_a$  and  
255  $iWUE$  were not significantly correlated with measures linked to the number or overall  
256 size of stomatal complexes (i.e. SCD, SCA or SCTA). However, traits including the  
257 component dimensions of stomatal complexes (i.e. SCL, SCLWR, and SPI) were  
258 negatively correlated with  $A$ ,  $g_s$ , and  $c_i/c_a$  and positively correlated with  $iWUE$ . And,  
259 SCW was positively correlated with  $A$ ,  $g_s$ , and  $c_i/c_a$  and negatively correlated with  
260  $iWUE$ .

261

## 262 **Linkage mapping**

263 143 individual QTL were identified (Fig. 7, Table S1) in total for the 16 traits  
264 tested in 2016 (60 QTL) and 2017 (83 QTL). Almost half of these QTL were  
265 independently identified for the same trait in both years, providing greater confidence  
266 for significant genotype to phenotyping associations at 36 loci spread across every  
267 chromosome except chromosome 4. The percentage of phenotypic variance explained  
268 (PVE) by individual QTL was 8.2 % on average, with a maximum of 18.3 % for PA at  
269 Chr9A (Fig. 7, Table S1). For the anatomical stomatal patterning traits tested in both  
270 years, the number of QTL identified varied from five QTL for SCL and six QTL for  
271 SPI to 18 QTL for SI and 20 QTL for SCD (Fig. 7, Table S1). In comparison, one to  
272 three QTL were identified for each of the functional leaf photosynthetic gas exchange  
273 traits, which were only tested in 2017. Correspondingly, the total PVE by all the QTL  
274 for a given trait was greater for the anatomical stomatal patterning traits (51 % on  
275 average in 2017) than for the photosynthetic gas exchange traits (17 % on average in  
276 2017; Fig. S6). In addition, for the anatomical stomatal patterning traits, the total PVE  
277 was generally equivalent or greater in 2017 (51 % on average) than in 2016 (45 % on  
278 average, Fig. S6). The traits with the greatest total PVE (i.e. > 50%) were SI, SCA,  
279 SCD, SCTA and PA, although total PVE was >35 % for all anatomical traits.

280 Many of the QTL for both anatomical and functional traits were located in  
281 clusters. 24 clusters were identified and named in sequence order (Fig. 7; Table S1;  
282 e.g. Chr1A – Chr1D for clusters on chromosome 1 based on their genetic position).  
283 The number of QTL in a cluster varied from two (Chr4A, Chr5C, Chr6C, Chr7C,  
284 Chr9C, Chr10B) to twelve (Chr6B). There are many examples of QTL co-localizing

---

285 for traits that are closely related. For example, SCL, SCLWR and SCA in cluster  
286 Chr2A or SCD, SCTA, SI and SPI in cluster Chr1B. Interestingly, only two clusters  
287 are limited to QTL from a single trait category of stomatal complex size traits,  
288 pavement cell traits, stomatal density and index traits or gas exchange traits. Cluster  
289 Chr4A contained QTL only for stomatal size traits and cluster Chr9C contained QTL  
290 only for pavement cell traits. The other 22 QTL clusters span at least two trait  
291 categories (Fig. 7; Table S1). The clusters Chr1C, Chr6A, Chr10A and Chr10B are  
292 notable for including overlapping QTL for both epidermal anatomy traits and  
293 photosynthetic gas exchange traits.

294 When QTL were independently identified for the same trait in both years, the  
295 direction of the allelic effect was always consistent (Fig. 7; Table S1). Allelic effects  
296 were also generally consistent with the trait correlations previously reported. As  
297 examples, all allelic effects for QTL at a given locus had opposing directions for SCD  
298 versus SCA, or PA versus PD. However, the direction of allelic effects at any  
299 individual locus was generally, but not universally, predictable from the trait means of  
300 the parental lines. For example, the MS71 allele resulted in lower SCD at 10 of the 17  
301 loci where QTL for SCD were identified, as would be consistent with the lower trait  
302 mean for the MS71 inbred line versus B73 (Fig. 7; Table S1). And, the MS71 allele  
303 resulted in greater SCA at 7 of the 12 loci where QTL for SCA were identified, as  
304 would be consistent with the greater trait mean for the MS71 inbred line versus B73.  
305 Consistent with trait values for the parental lines, all of the statistically significant  
306 MS71 alleles resulted in lower  $g_s$  relative to B73 alleles. In contrast to other QTL,  
307 MS71 alleles in cluster Chr1C were associated with lower  $g_s$  and greater SD,  
308 highlighting the complexity of genetic control of these traits.

309

310



---

311 **DISCUSSION**

312 Deep-learning has been proposed as a solution for a wide variety of applications  
313 in plant phenotyping (Ubbens and Stavness, 2017; Mochida et al., 2018; Singh et al.,  
314 2018; Jiang and Li, 2020). Despite this promise and publication of a number of tools,  
315 no solution has been widely adopted to assess stomatal patterning. This study  
316 successfully met the goals of building, testing, and demonstrating the use of a  
317 high-throughput phenotyping pipeline, including automated image analysis by use of  
318 machine learning for stomatal patterning traits in a model  $C_4$  species. This was  
319 applied to two-years of samples taken from a field-grown RIL population to advance  
320 understanding of the genetic architecture and trait relationships of stomatal patterning  
321 and leaf photosynthetic gas exchange in maize. Understanding of genetic variation in  
322 stomatal development and function is particularly poor in  $C_4$  species. As such, the  
323 study addresses both technical and biological knowledge gaps that have been  
324 long-standing despite the considerable advances in understanding stomatal biology  
325 that have been made in recent years (Lawson and Vialet-Chabrand, 2019; Harrison et  
326 al., 2020; McKown and Bergmann, 2020).

327

328 **High-throughput phenotyping pipeline for stomatal patterning traits**

329 *Data Acquisition*

330 Optical tomography (OT) was an effective method for imaging the leaf epidermis  
331 of diverse maize lines (Fig. 2; Fig. S3). This proof-of-concept built upon previous  
332 applications in individual genotypes of *Arabidopsis* (Haus et al., 2018), tobacco  
333 (Głowacka et al., 2018) and other dicot species (Haus et al., 2015). Each field of view  
334 could be acquired in less than 1 minute, so sampling four or five fields of view per  
335 leaf allowed 60 leaves to be comfortably screened with a single microscope in a  
336 standard 8-hr work day. This was more efficient and less arduous than our experience  
337 of taking leaf impressions or epidermal peels.

338 Data describing 11 different traits related to stomatal patterning were all  
339 significantly correlated across the two growing seasons, despite variation in the  
340 growing environment in the field (Fig. 5; Fig. S2). And, this led to consistent findings  
341 on trait relationships and the genetic architecture of stomatal traits across the years  
342 (Figs. 6, 7, S6).

343 *Image Analysis*

344 The Mask R-CNN machine learning tool was successfully trained to  
345 automatically locate cells, identify cell classes, segment boundary coordinates and  
346 extract density and size traits for stomata as well as pavement cells of maize leaf  
347 epidermis. Automatic image analysis was more than 100 times faster than manual  
348 measurement of all traits (Table 1). Correlations between the number of stomata and  
349 pavement cells identified and counted by the computer versus expert humans were very  
350 strong ( $r^2 > 0.96$ ) and showed little bias (Fig. 3A,B). This reflected robust predictions

351 across a range of cell morphologies and image qualities, including for partial cells on  
352 image edges, and pavement cells above veins (Fig. S7). A second validation step that  
353 analyzed all available images for six genotypes that represented the range of SCD and  
354 PD in the RIL population suggests the variance is mainly coming from biological  
355 replicates, instead of technical errors (Fig. 3C,D). So, the pipeline produced equivalent  
356 or higher quality data much more rapidly.

357 Correlations between computer generated estimates and human assessment of  
358 traits describing stomatal complex size were also highly significant (Fig. 4). This  
359 aided detection of consistent results across seasons (Fig. 5), and was achieved despite  
360 the additional challenge of stomatal size varying less across the RIL population  
361 (~50%) than SCD (>100%). Nonetheless, accurate and precise estimation of stomatal  
362 size, and SCW in particular, pushed the limits of image resolution when data were  
363 collected with the 20X objective lens used in this study. While this approach did allow  
364 many QTL and trait relationships to be identified, additional imaging using higher  
365 magnification lenses to deliver greater resolution from the OT will likely deliver  
366 further gains in phenotyping of these traits.

367 The pipeline represents a valuable technical advance because previously published  
368 automatic stomatal detection and counting algorithms: (1) used data that was collected  
369 by slow and laborious methods (e.g. Aono et al., 2019; Bhugra et al., 2019; Sakoda et  
370 al., 2019); (2) were limited to detecting stomata and not pavement cells (e.g. Dittberner  
371 et al., 2018; Fetter et al., 2019; Li et al., 2019; Sakoda et al., 2019); (3) did not achieve  
372 the same accuracy (e.g. Duarte et al., 2017; Saponaro et al., 2017; Bourdais et al.,  
373 2019); or (4) were demonstrated to work only within the constrained variation of a  
374 limited sample set, which did not include demonstrated applicability for quantitative  
375 genetics (e.g. Aono et al., 2019; Fetter et al., 2019; Li et al., 2019). While previous  
376 studies achieved these goals individually, combining these features resulted in a tool  
377 that could be applied to addressing knowledge gaps about the genetic architecture of  
378 SCD and SI in maize.

379 The independent application of the same tool to stomatal counting in grain  
380 sorghum suggests that, with the appropriate training, it has the flexibility and power to  
381 be widely applicable (Bheemanahalli et al., in review). But, as with all machine  
382 learning solutions to image analysis, there are significant questions about the context  
383 specificity of the model used. In the current study, the focus was on development of a  
384 method that was robust across a RIL population of a model C<sub>4</sub> grass species, which  
385 included significant variation in many patterning traits but was also subtle relative to  
386 large datasets that span many species (Sack et al., 2003). Additional work will be  
387 needed to test if new models need to be trained for each individual mapping  
388 population or species of interest. One option may be transfer learning methods (Singh  
389 et al., 2018) to accelerate the development of machine learning models for new  
390 species or even a generic model. Even if this is not possible, training the Mask  
391 R-CNN tool required relatively few training instances (33 images containing roughly  
392 2000 cells for stomatal traits and 9000 cells for pavement cell traits). So, building new  
393 models for different applications should be a tractable goal.

394

### 395 **Trait variation across the RIL population and years**

396 SCD of maize B72 x MS71 RILs showed a similar range to intraspecific variation  
397 in faba bean (Khazaei et al., 2014), wheat (Schoppach et al., 2016; Shahinnia et al.,  
398 2016), *Arabidopsis* (Dittberner et al., 2018) and rice (Kulya et al., 2018; Laza et al.,  
399 2010). Mean SCD and SCL of the RIL population were very similar to the abaxial  
400 trait values for maize and in the mid-range of a diverse set of species previously  
401 reported by (McAusland et al., 2016). Therefore, maize does not represent an unusual  
402 extreme in terms of epidermal phenotype. Thus, the methods and biological  
403 discoveries here may relate to other species. Although, further comparative work is  
404 needed as grass epidermal patterning is distinct from that of dicots, and C<sub>4</sub> species  
405 may be expected to differ from C<sub>3</sub> relatives as a result of broader differences in leaf  
406 development and function associated with Kranz anatomy and associated biochemical  
407 specialization (Larkin et al., 1997).

408 The temperature of the 2017 growing season was similar to 2016, but there was  
409 ~43 % less precipitation (Fig S2). While this would normally be expected to drive  
410 plasticity in stomatal patterning traits, irrigation was applied to avoid plant drought  
411 stress in 2017. Consistent genetic variation in stomatal patterning traits between the  
412 two years suggests that these traits are, at least, moderately heritable (Fig. 5). SLA  
413 differed between years, probably as a result of harvesting material directly from the  
414 field in 2016 (low SLA due to high non-structural carbohydrate content) versus after  
415 leaves had been held in the lab for photosynthetic gas exchange measurements in  
416 2017 (higher SLA after starch reserves were respired under low light conditions in the  
417 laboratory). Nonetheless, genetic variation in SLA was correlated across years and  
418 relationships between SLA and other traits were similar across years. Therefore, the  
419 resulting data for all traits should be highly amenable for studying trait relationships  
420 and QTL mapping. Getting such information under mesic conditions without  
421 significant drought stress is valuable because it reduces the likelihood of complex  
422 plant-environment interactions that can complicate investigation of genetic variation  
423 in *iWUE* and associated traits (Leakey et al., 2019).

424

### 425 **Trait relationships**

426 For the maize B73 x MS71 RIL population, leaf photosynthetic traits and  
427 stomatal patterning traits clustered into largely separate groups within which many  
428 traits were correlated (Fig. 6). But, there were relatively few correlations between  
429 stomatal patterning traits and leaf photosynthetic traits. Most notably, while the  
430 classic trade-off between SCD and SCA was observed, there was no significant  
431 correlation between SCD or SCA and  $g_s$  or any other gas exchange trait. This  
432 contrasts with the widely held expectation that greater  $g_s$  will be associated with larger  
433 numbers of smaller stomata (Dow et al., 2014; Faralli et al., 2019). This expectation is  
434 strongly grounded in theory and data from broad fossil-based comparisons over

435 phylogenetic space and geological time (Franks and Beerling, 2009). Significant  
436 relationships between SCD and water fluxes have also been observed in experiments  
437 on intraspecific variation in sorghum (Muchow and Sinclair, 1989), rice (Panda et al.,  
438 2018), and barley (Miskin et al., 1972). But, there are also a number of studies where  
439 SCD was not correlated with  $g_s$  in wheat (Liao et al., 2005), rice (Ohsumi et al., 2007),  
440 and barley (Jones, 1977). This discordance among studies, and the relatively weak  
441 nature of the relationship between SCD and  $g_s$  that is observed when it does occur  
442 within species, indicates how incompletely these structure-function relationships are  
443 understood. Therefore, the high-throughput phenotyping methods presented here,  
444 which can allow analysis across more and different types of genetic variation, will be  
445 valuable. One benefit of testing trait relationships within a RIL population is that the  
446 recombination of parental alleles resulting from making crosses breaks up gene  
447 linkage that can result from selection and underlie trait relationships, providing a  
448 more direct test of the biophysical basis for trait relationships (Des Marais et al.,  
449 2013).

450 It was assumed that the dimensions of stomatal complexes provided information  
451 about the maximum size of stomatal pores, based on previous reports for  $C_4$  grasses  
452 (Taylor et al., 2012) and tomato (Fanourakis et al., 2015). Significant correlations  
453 were observed between leaf gas exchange traits and SCL, SCW and SCLWR (Fig. 6).  
454 Even though there was no relationship between  $g_s$  and overall SCA, greater  $g_s$  was  
455 associated with stomatal complexes being wider and shorter. This would be consistent  
456 with the morphology of the stomatal pore and/or the guard cells and subsidiary cells  
457 that surround it playing an important role in determining steady-state gas fluxes  
458 (Harrison et al., 2020). And, it suggests that the structure-function relationships of  
459 stomatal size-WUE in  $C_4$  species may parallel those previously reported in  
460 *Arabidopsis* (Des Marais et al., 2014; Dittberner et al., 2018). But, the influence of  
461 these traits on steady-state gas exchange is much less well understood than its  
462 influence on the dynamics of stomatal opening and closing (McAusland et al., 2016).  
463 It is also possible that trade-offs between stomatal density, stomatal size and the  
464 extent of stomatal opening mean that accurate predictions of  $g_s$  are possible only  
465 when all three of these traits are accounted for. It is also possible that variation in  
466 stomatal patterning between abaxial and adaxial leaf surfaces influenced  $g_s$  in a way  
467 that was not captured in the dataset on abaxial traits reported here. But, there are  
468 approximately 50% more stomata on the abaxial surface, so it should exert more  
469 influence. And, SI of the two leaf surfaces are correlated across diverse maize inbred  
470 lines (Michael Mickelbart, pers. comm.).

471 Understanding the basis for genetic variation in *iWUE* is important because of the  
472 benefits to crop productivity, sustainability and resilience that result from improving  
473 this key resource use efficiency (Leakey et al., 2019). Greater *iWUE* was strongly  
474 associated with lower  $g_s$  and more weakly associated with lower *A* (Fig. 6). This was  
475 consistent with studies on sorghum (Kapanigowda et al., 2013; Fergusson et al., in  
476 review) and switchgrass (Taylor et al., 2016), although the strength of the correlations  
477 in maize were significantly stronger. And, it supports the notion that selection for low

478  $g_s$ , without equivalently large decreases in  $A$  may be an approach to improving  $iWUE$   
479 (Leakey et al., 2019). Of all the stomatal patterning traits, SCLWR had the strongest  
480 correlation with  $iWUE$  ( $r = 0.28$ ). It meant that longer, narrower stomatal complexes  
481 were associated with lower  $g_s$  and greater  $iWUE$  (Fig. 6). While this explained only a  
482 modest proportion of variation in  $iWUE$ , it was equivalent to the strength of the  
483 relationship between each of the leaf gas exchange traits and SLA, which is widely  
484 recognized as a key component of the leaf economic spectrum across broad  
485 phylogenetic space (Wright et al., 2004) as well as for  $C_4$  grasses (Atkinson et al.,  
486 2016). SCLWR was not associated with variation in PD, PA or PTA (Fig. 6). This  
487 opens up the possibility that this apparently important trait might be manipulated by  
488 breeding or biotechnology with minimal unpredictable side effects on epidermal  
489 patterning in general. However, the detailed information on epidermal cell allometry  
490 provided by the OT images and machine learning algorithm used in this study does  
491 also reveal complex relationships among cell types on the leaf surface. For example,  
492 PA and SCA are positively correlated, as are SCD and PD (Fig. 6). And, this is  
493 consistent with genetic variation in cell size being general in nature across the two  
494 major classes of epidermal cells types. However, this occurs at the same time as the  
495 tradeoff between SCD and SCA. So, a decrease in SCD appears to coincide with a  
496 compensatory increase in PA to fill the available space rather than an increase in PD.  
497 And, while SCL and SCW both drive variation in SCA, they are not correlated with  
498 each other, and they have opposing relationships with SI, SPI, SLA and the gas  
499 exchange traits (Fig. 6). Evaluating how stomatal complex size and proportion varies  
500 when SCD is manipulated transgenically may help reveal the key interdependencies  
501 between traits.

502

### 503 **QTL mapping**

504 Of 60 QTL identified in 2016 and 83 QTL identified in 2017, 36 were  
505 consistently observed in both years (Fig. 7). Additionally, 24 hotspots of overlapping  
506 QTLs for multiple traits were identified. The number and strength of QTL identified  
507 for leaf gas exchange traits (1-3 QTL per trait in a single experiment) were similar to  
508 previous studies of those traits (Hervé et al., 2001; Teng et al., 2004; Pelleschi et al.,  
509 2006). In contrast, a greater number of QTL were identified for many of the stomatal  
510 patterning traits (e.g. PD – 7, SI - 10, SCA – 10, SCD – 12, SCTA – 7 QTL in a single  
511 experiment) than in previous studies (Vaz Patto et al. 2003, Hall et al. 2005, Laza et al.  
512 2010, Schoppach et al. 2016, Shahinnia et al. 2016, Liu et al. 2017, Sumanthi et al.  
513 2018, Delgado et al. 2019; Prakash 2020). This larger number of significant QTL was  
514 linked to more small effect QTL (PVE < 10%) being successfully identified. This was  
515 unlikely to be the result of false positives because of the consistency in results across  
516 the two years of experimentation. This is valuable given the broad evidence  
517 suggesting that these stomatal patterning traits are likely to be polygenic, with  
518 multiple small effect alleles combining to drive phenotypic variation (Schoppach et al.,  
519 2016; Shahinnia et al., 2016; Dittberner et al., 2018; Bheemanahalli et al., in review;  
520 Ferguson et al., in review).

521 Many genes have been implicated in the network regulating cell fate during the  
522 differentiation of the epidermis, and therefore stomatal patterning (Pillitteri and Torii,  
523 2012; McKown and Bergmann, 2020). While QTL intervals are too large to allow the  
524 causal genes underlying the genotype-phenotype association to be identified, it was  
525 possible to determine whether QTL did or did not overlap with the locations of known  
526 stomatal developmental genes in maize or orthologs of known stomatal patterning  
527 genes in *Arabidopsis* (Table S1). Focusing on the genomic locations where genotype  
528 to phenotype associations were identified with greatest overall confidence reveals that  
529 orthologs of known stomatal patterning genes were found within the genomic regions  
530 of 16 of the 24 QTL clusters identified in this study. For example, an ortholog of  
531 EPIDERMAL PATTERNING FACTOR 2 (EPF2, GRMZM2G051168) and Pangloss1  
532 (PAN1, GRMZM5G836190) were co-located within 1 cM of the most significant  
533 markers for SCD, PA,  $c_i/c_a$  and  $g_s$  in cluster Chr1C (Table S1). PAN1 regulates  
534 subsidiary mother cell divisions (Cartwright et al., 2009), while EPF2 is a negative  
535 regulator of the number of stomata (Hara et al., 2009). QTL cluster Chr10A  
536 co-localized with the maize ortholog of *Arabidopsis* A2-type cyclin CYCA2;1  
537 (GRMZM5G879536). RNAi knock-down of OsCYCA2;1 in rice led to significantly  
538 reduced stomatal production, but did not disrupt guard mother cell division, as was  
539 the case in *Arabidopsis* (Vanneste et al., 2011; Qu et al., 2018). If confirmed, the  
540 involvement of these genes, and others in Table S1, in regulating stomatal patterning  
541 in maize would be consistent with the notion that the same set of genes regulates cell  
542 fate to control stomatal patterning in dicots and monocots, but the roles of individual  
543 genes within the network have been modified over the course of evolutionary time  
544 (Raissig et al., 2016; Raissig et al., 2017; Wu et al., 2019). At the same time, the  
545 identification of multiple high confidence QTL that do not overlap with existing  
546 candidate genes also suggests the possibility that additional genes regulating stomatal  
547 patterning remain to be discovered and high-throughput phenotyping of stomatal  
548 patterning could aid in their discovery.

549 The discovery of multiple QTL for many stomatal patterning traits suggests that  
550 the goal of reducing  $g_s$  and improving  $iWUE$  by reducing SCD or increasing SWLCR  
551 could be achieved through breeding to combine alleles that would result in more  
552 extreme trait values than were found in either of the parental inbred lines. This is  
553 particularly the case when not all MS71 alleles were associated with, for example,  
554 lower SD. Further work is needed to test that possibility and also to determine  
555 whether overlapping QTL within clusters are multiple loci in linkage versus the  
556 pleiotropic effects of a single locus.

## 557 **Conclusion**

558 This study presents an end-to-end pipeline for high-throughput phenotyping of  
559 stomatal patterning. New insights were generated on trait relationships within and  
560 between stomatal anatomical features and leaf photosynthetic gas exchange. And, the  
561 genetic architecture of stomatal patterning and leaf gas exchange traits was  
562 characterized in detail. These insights lay the ground work to: (1) apply the  
563 high-throughput phenotyping pipeline to other experiments taking quantitative

564 genetics, reverse genetics or forward genetics approaches; and (2) further investigate  
565 the physiological and genetic basis for variation in stomatal development, stomatal  
566 conductance and *iWUE* in C<sub>4</sub> species, which is poorly understood despite the  
567 agricultural and economic significance of these crops.

568

## 569 **MATERIALS AND METHODS**

### 570 **Plant material and sampling**

571 Field experiments were done on the University of Illinois at Urbana-Champaign  
572 South Farms in Savoy, IL (40°02'N, 88°14'W). Seeds were planted on May 24<sup>th</sup> in  
573 2016 and May 17<sup>th</sup> in 2017 with a planting density of 8 plants/m and row spacing of  
574 0.76 m. The crop was grown in rotation with soybean and received 200 kg/ha of  
575 nitrogen fertilizer. A population of recombinant inbred lines (RILs) derived from a  
576 B73 × MS71 cross was grown, with 197 RILs planted in 2016 and 192 RILs plus the  
577 parental lines planted in 2017. This population is a subset of the maize Nested  
578 Association Mapping (NAM) population (Yu et al., 2008) and was selected as a result  
579 of the parent lines having low (MS71) and moderate (B73) SCD compared to the other  
580 inbred founder lines in an initial screen performed at the same field site (Fig. S1). Seeds  
581 were obtained from the Maize Genetics Cooperation Stock center (University of  
582 Illinois Urbana-Champaign). In 2016, four replicate plants were sampled at random  
583 from within the middle portion of nursery rows, which were also self-fertilized for  
584 seed production. In 2017, a randomized complete block design was used with two  
585 blocks, each containing a replicate plot for each RIL and 6 replicate plots for each  
586 parental line. Two sub-samples were collected from separate plants in all replicate  
587 rows. In 2017 the field was equipped with drip tape and irrigation was applied  
588 uniformly across all genotypes whenever early signs of drought stress were observed.  
589 Temperature and precipitation were recorded by the Water and Atmospheric  
590 Resources Monitoring Program (Fig. S2). (Illinois Climate Network. 2019. Illinois  
591 State Water Survey, 2204 Griffith Drive, Champaign, IL 61820-7495.  
592 <http://dx.doi.org/10.13012/J8MW2F2Q>.)

593 In both years, measurements were taken on the second leaf beneath the flag leaf  
594 following anthesis. In 2016, collection of leaf samples for phenotyping epidermal cell  
595 patterning and specific leaf area (SLA) was done in the field. In 2017, tissue sampling  
596 was performed after photosynthetic gas exchange measurements were done on the  
597 leaves. To allow for this, leaves were cut early in the morning at the base of the leaf  
598 blade distally adjacent to the ligule. Cut ends were then submerged in buckets of  
599 water and transported to the laboratory. The leaves were then re-cut under water and  
600 remained in 50 ml tubes of water during measurements of gas exchange and tissue  
601 sampling.

602

### 603 **Epidermal Image acquisition**

604 To phenotype epidermal cell patterning, ~0.5 cm-wide strips were excised from  
605 the margin to the mid-rib at a point halfway along the length of a leaf using scissors.  
606 Samples were immediately stored in a 2 ml tube, flash frozen in liquid nitrogen, and  
607 stored at -20 °C. Leaves were flattened and stabilized onto glass slides with  
608 double-sided tape immediately prior to imaging. Abaxial surfaces were imaged with a  
609 Nanofocus  $\mu$ surf Explorer Optical Topometer (Oberhausen, Germany) at 20X  
610 magnification with 0.6 numerical aperture. The topography layer was constructed by  
611 stacking all the focused pixels across planes of the Z axis. Output images were 0.8mm  
612 x 0.8mm on x and y axes (512 x 512 pixels). Five fields of view were scanned on each  
613 leaf sample in 2016 and four fields of view were scanned on each leaf sample in 2017.  
614 Fields of view were arranged equidistantly along a latitudinal transect from the leaf  
615 edge to mid-rib. Sample loss or poor sample quality resulted in incomplete replication  
616 for 22 RILs in 2016 and 2 RILs in 2017. Therefore, in total, 3785 images were in the  
617 2016 dataset and 3248 images were in the 2017 dataset (Fig. 1A).

618 The 3D topographic layer (Fig. 2A) was input into Nanofocus  $\mu$ surf analysis  
619 extended software (Oberhausen, Germany) for image processing as follows: first,  
620 non-measured points were filled by a smooth shape calculated from neighboring  
621 points. A Robust Gaussian filter with cut-offs of 200 $\mu$ m, 100 $\mu$ m and 100 $\mu$ m were  
622 applied in sequence (Fig. 2B). Then, a Laplacian filter with a 13x9 pixel kernel size  
623 was implemented (Fig. 2C) before applying another Robust Gaussian filter with a  
624 cut-off of 80 $\mu$ m. The final 3D layer was then flattened to 2D in grey scale with auto  
625 optimization for luminosity and contrast enhancement.

626

### 627 **Mask R-CNN Model training**

628 Twenty four images were initially randomly selected for training the mask  
629 R-CNN model for object instance segmentation. Subsequently, nine additional images  
630 of pavement cells that overlie minor veins were added to the training set to improve  
631 the detection accuracy for these cells. Each stomatal complex and pavement cell was  
632 traced as an object instance using VGG Image Annotator (VIA) (Dutta and Zisserman,  
633 2019). A JavaScript Object Notation (.json) file was generated for each image to  
634 record the coordinates for all instance masks within that image. Json files of 26  
635 randomly selected images were pooled to form the training set, and 7 images were  
636 pooled into a validation set (i.e. approximately 11,000 unique cells used for model  
637 training; Fig. 1A). A Mask R-CNN repository built by Matterport Inc. on GitHub  
638 (Waleed, 2017) was used for training on a customized PC with a GeForce GTX 1080  
639 Ti graphics processing unit and 32G of RAM. Model training was based on the  
640 ResNet-101 backbone with pretrained weights from the COCO dataset (Lin et al.,  
641 2014) with 50 epochs of 100 steps. The learning rate, learning momentum, and weight  
642 decay was 0.001, 0.9, and 0.0001, respectively. All images were flipped horizontally  
643 and vertically for augmentation. The process taken by Mask R-CNN to make  
644 predictions on the instances, size and shape of pavement and stomatal cells is  
645 summarized in Fig. 1B.



646

## 647 **Epidermal cell detection, trait extraction and evaluation**

648 The model built during the training process was applied to the detection of cells  
649 in the entire image dataset, using the same software and hardware configurations.  
650 Instance coordinates and cell type predictions saved by Mask R-CNN model as  
651 individual csv files were inputted into R for epidermal trait extraction. The number of  
652 stomatal complex and pavement cells within each image were derived as the number  
653 of instances detected for these two separate classes and they were standardized by  
654 image area to get stomatal complex density (SCD) as well as pavement cell density  
655 (PD). The areas of complete, individual stomatal complexes and pavement cells were  
656 calculated based on the boundary coordinates using the *splancs* package (version  
657 2.01-40). To derive the stomata complex length (SCL) and width (SCW), an ellipse  
658 was first fitted to each stomatal complex using *MyEllipsefit* package (version 0.0.4.2).  
659 Stomatal complex width and length were calculated as doubling the radius along the  
660 minor and major axis, respectively (Fig. 2G). Total stomatal pore area index (SPI;  
661 Sack et al., 2003) is the product of stomatal complex density (SCD) and stomatal  
662 complex length (SCL) squared. Stomata index (SI) is the number of stomata divided  
663 by the total number of epidermal cells. The *Imager* package (version 0.41.2) and  
664 *magick* package (version 2.0) were used to label cells and cell boundaries on detection  
665 output images for better visualization.

666 For validation of SCD and PD, a group of people received training on stomata  
667 and pavement cell recognition and reached consensus on the criteria. Two sets of  
668 images that were not part of the training dataset were then manually assessed (Fig.  
669 1A). First, six people each manually measured 100 images selected at random from  
670 the 2016 and 2017 data. Second, five people each manually measured all images for  
671 six genotypes, chosen to represent the range of observed epidermal cell densities,  
672 selected from the 2016 dataset. Manual counting was done in Image J 1.8.0  
673 (Schneider et al., 2012) using the multi-point tool. To validate predictions of stomatal  
674 size traits by Mask R-CNN, 6 humans each manually measured the same 5 stomatal  
675 complexes in each of 42 randomly selected images that were not part of the training  
676 dataset (Fig. 1A

## 677 **Leaf photosynthetic gas exchange and SLA**

678 In 2017, photosynthesis and stomata conductance were measured using four  
679 LI-6400 portable photosynthesis systems incorporating an infrared gas analyser  
680 (IRGA) (LI-COR, Lincoln, NE, USA) that were run simultaneously using the protocol  
681 of Choquette et al. (2019). 4 leaf disks were sampled using a leaf punch from the  
682 same leaf sampled for stomata scanning. Leaf disks were dried in an oven at 60 °C  
683 before being weighed on a precision balance (Mettler Toledo XS205, OH, USA). SLA  
684 ( $\text{cm}^2\text{g}^{-1}$ ) was calculated as the area for leaf punch divided by the mean leaf disk  
685 weight.

686

---

687 **Statistical analysis**

688 All statistical analysis was performed in R (version 3.6.0,  
689 <https://www.r-project.org>). Pearson correlations were performed and visualized using  
690 *corrplot* package (version 0.84).

691 The genetic map for B73 x MS71 population consists of 1478 SNPs distributed  
692 across all 10 chromosomes of maize (McMullen et al., 2009). SNP data were  
693 available as part of the Maize Diversity Project (<https://www.panzea.org>). Markers  
694 were phased and imputed to a density of 1 centiMorgan (cM) resolution. Quantitative  
695 trait loci (QTL) mapping for two years was done separately and performed in R for  
696 each individual trait using the *stepwiseqtl* function with Haley-Knott algorithm from  
697 package *qtl* (Broman et al., 2003) to create a multiple QTL model. A multi-locus  
698 model was generated using the stepwise forward selection and backward elimination.  
699 The Logarithm of the odds (LOD) penalties for QTL selection were calculated using  
700 the *scantwo* function with 1000 permutations for each trait at significance level of  
701 0.05. Following Dupuis and Siegmund (1999) and Banan et al. (2018), 1.5-LOD  
702 support intervals were used for each QTL hit. Co-localized QTL were grouped into  
703 “clusters” based on their mapping to same or neighboring markers where confidence  
704 intervals overlapped. The few QTL with very large confidence intervals (>50 cM),  
705 were excluded from clusters. Clusters were named in sequence order (Fig. 7; Table S1;  
706 e.g. Chr1A – Chr1D for clusters on chromosome 1 based on their genetic position).  
707 Maize 5b gene model coordinates and annotations were both downloaded from  
708 MaizeGDB (<https://www.maizegdb.org>).

709

710 **Acknowledgements**

711 This work was supported by a grant from the NSF Plant Genome Research Program  
712 (PGR-1238030) and the University of Illinois at Urbana-Champaign Center for  
713 Digital Agriculture. Jiayang Xie was supported by a Foundation for Food and  
714 Agriculture Research Fellowship. We thank Anthony Studer for helpful discussions on  
715 QTL mapping and Elizabeth Ainsworth for comments on a draft manuscript. We thank  
716 Patrick Brown, Christopher Montes, Crystal Sorgini and Benjamin Thompson for  
717 assistance with acquisition of germplasm, as well as establishment and maintenance  
718 of field plots. We thank Timothy Wertin, Nicole Choquette, Jim Berry, Aya Bridgeland  
719 and Chris Moller for assistance with sample and data collection. We thank Bindu  
720 Edupulapati, Kayla Raflores, Varun Govind and Vishnu Chavva for assistance with  
721 manual assessment of stomatal traits in OT images.

722

723

---

**Table 1.** *Time investment approximations for epidermal cell detection and trait extractions comparing manual measurements versus automated detections.*

SCD, Stomatal complex density; SCA, stomatal complex area; PD, pavement cell density; PCA, pavement cell area; h, hours. Estimations were done on 20X magnification maize abaxial images (0.8mm x 0.8mm) for a mapping population with 200 lines, 4 replications and 5 leaf level sub-samples (4000 images). Asterisk designates time estimation for all traits combined.

---

| Trait | Manual measurement<br>for each image | Manual measurement<br>for mapping<br>population with 200<br>lines | Automated phenotyping<br>for mapping population<br>with 200 lines |
|-------|--------------------------------------|-------------------------------------------------------------------|-------------------------------------------------------------------|
| SCD   | 2 min                                | 133 h                                                             |                                                                   |
| SCA   | 1 h                                  | 4,000 h                                                           | 120 h*                                                            |
| PD    | 8 min                                | 533 h                                                             |                                                                   |
| PA    | 3 h                                  | 12,000 h                                                          |                                                                   |

---

724

725

726

727

728

729

730

731

732

733

734

735

736

737

738

739

740

741

742 **Figure Legends**

743 FIGURE 1. Workflow of data collection, model training, model prediction, human  
744 validation and experimental data analysis used to phenotype epidermal cell patterning  
745 traits (A). Summary of pipeline used by Mask R-CNN to analyze images captured by  
746 optical tomography for stomata and pavement cell detection. Image example was  
747 truncated from standard image.

748 FIGURE 2. Example steps in the process of analyzing an optical tomography image  
749 for epidermal cell patterning, including: the 3D topography image layer extracted  
750 from raw files output by the optical topometer (A); flattening by use of Robust  
751 Gaussian filters (B); contrast enhancement by use of a Laplacian filter (C); prediction  
752 of cell instances by Mask R-CNN (D, E, F, G). Cell related traits were calculated and  
753 extracted based on cell boundary coordinates, with boundary and centroid labeled for  
754 better visualization (E). Zooming in shows stomata were labeled with white centroids  
755 while pavement cells were labeled with black centroids (F). Cells that were cut off on  
756 image edges were tagged with triangles and were excluded in estimation of average  
757 cell size. Ellipses were fit to stomatal complexes, with width and length calculated as  
758 the lengths of minor and major axis of the ellipse (red lines; G).

759 FIGURE 3. Scatterplots of stomatal patterning traits comparing data measured by  
760 humans versus data measured by the computer using MASK R-CNN: stomatal  
761 complex density (A,C); and pavement cell density (B,D). Plotted data describe 100  
762 randomly selected optical tomography images from the B73 x MS71 maize RIL  
763 population with error bars showing the standard error of technical variation among six  
764 expert human evaluators on each individual image (A,B) or genotype means for 6  
765 RILs selected to represent the range of observed trait values in the population with  
766 error bars showing the standard error of biological variation among replicates based  
767 on the mean of predictions from six expert human evaluators or computer predictions  
768 using MASK R-CNN (C,D). There is no variance among predictions by MASK  
769 R-CNN when it is presented with a given image multiple times. The line of best fit  
770 (red line) and 1:1 line (black dashed line) are shown along with the correlation  
771 coefficient ( $r^2$ ).

772 FIGURE 4. Scatterplots of stomatal complex length (A), stomatal complex width (B)  
773 and stomatal complex area (C) comparing data measured by humans versus data  
774 measured by the computer using MASK R-CNN: Plotted data describe 210 stomatal  
775 complexes (5 each from 42 images) randomly selected from the B73 x MS71 maize  
776 RIL population with error bars showing the standard error of technical variation  
777 among six expert human evaluators on each individual image. There is no variance  
778 among predictions by MASK R-CNN when it is presented with a given image  
779 multiple times. The line of best fit (red line) and 1:1 line (black dashed line) are  
780 shown along with the correlation coefficient ( $r^2$ ).

781 FIGURE 5. Scatterplots of stomatal complex density (SCD, A), stomatal complex  
782 width (SCW, B), stomatal complex length (SCL, C), stomatal complex area (SCA, D),  
783 stomatal complex total area (SCTA, E), stomatal complex length to width ratio  
784 (SCLWR, F), pavement cell density (PD, G), pavement cell area (PA, H), pavement

785 cell total area (PTA, I), stomatal index (SI, J), stomatal pore area index (SPI, K),  
786 specific leaf area (SLA, L) comparing genotype means for 191 maize B73 x MS71  
787 RILs grown during the 2016 versus 2017 field seasons. The line of best fit (black line),  
788 correlation coefficient ( $r^2$ ) and associated p-value are shown.

789 FIGURE 6. Correlation matrix for stomatal complex density (SCD), stomatal complex  
790 width (SCW), stomatal complex length (SCL), stomatal complex area (SCA),  
791 stomatal complex total area (SCTA), stomatal complex length to width ratio  
792 (SCLWR), pavement cell density (PD), pavement cell area (PA), pavement cell total  
793 area (PTA), stomatal index (SI), stomatal pore area index (SPI), specific leaf area  
794 (SLA), rate of photosynthetic CO<sub>2</sub> assimilation (*A*), stomatal conductance ( $g_s$ ), ratio of  
795 leaf intercellular to atmospheric CO<sub>2</sub> concentration ( $c_i/c_a$ ) and intrinsic water use  
796 efficiency (*iWUE*), based on genotype means of the maize B73 x MS71 RIL  
797 population grown in 2017 ( $n = 194$ ). Statistically significant correlations ( $p < 0.05$ ) are  
798 highlighted with colored cells that reflect the strength of the correlation by the size of  
799 the shaded area and are colored from red (positive correlation, coefficient = 1) to blue  
800 (negative correlation, coefficient = -1).

801 FIGURE 7. QTL mapping for stomatal complex density (SCD), stomatal complex  
802 width (SCW), stomatal complex length (SCL), stomatal complex area (SCA),  
803 stomatal complex total area (SCTA), stomatal complex length to width ratio  
804 (SCLWR), pavement cell density (PD), pavement cell area (PA), pavement cell total  
805 area (PTA), stomatal index (SI), stomatal pore area index (SPI), specific leaf area  
806 (SLA), rate of photosynthetic CO<sub>2</sub> assimilation (*A*), stomatal conductance ( $g_s$ ), ratio of  
807 leaf intercellular to atmospheric CO<sub>2</sub> concentration ( $c_i/c_a$ ) and intrinsic water use  
808 efficiency (*iWUE*) from the B73 x MS71 RIL population. Each panel corresponds to  
809 an individual chromosome, where the values on the x-axis are chromosome position  
810 (cM). Numbers in parentheses following abbreviated trait names on the y-axis  
811 indicate the total number of QTL for that trait detected across the two growing  
812 seasons and the number of QTL for that trait that were detected consistently across  
813 both growing seasons. Each triangle represents a single QTL detected, with the  
814 direction of the arrow corresponding to the directional effect of the MS71 allele.  
815 Triangles are colored to indicate QTLs that were significant in 2016 (red), 2017 (blue),  
816 or overlapping across both years (purple). Error bars indicate the 1.5 LOD support  
817 intervals. Grey shaded areas indicate clusters of co-located QTL. The location of  
818 orthologs of known stomatal patterning genes in *Arabidopsis* are indicated with grey  
819 dots.

820

821

822

823

824

825

826 FIGURE S1. Initial screening of stomatal complex density (SCD; A), pavement cell  
827 density (PD; B) and stomatal index (SI; C) for maize NAM founder lines grown in  
828 year 2014 (n = 4). Error bars indicate standard errors.

829 FIGURE S2. Daily mean temperature (red line; °C) and water inputs to field trials  
830 (blue bars = total daily precipitation, red bars = irrigation; mm) in Savoy, Illinois for  
831 each day of year (DOY) in the 2016 (A) and 2017 (B) growing seasons.

832 FIGURE S3. Scatterplots of variation among six expert human evaluators in manual  
833 measurements of stomatal patterning traits from 100 randomly selected optical  
834 tomography images from the B73 x MS71 maize RIL population: stomatal complex  
835 density (A), pavement cell density (B), stomatal complex width (C), stomatal complex  
836 length (D) and stomatal complex area (E). Data are sorted on the x-axis by rank of the  
837 mean trait value for each genotype. The color of a data point corresponds to the  
838 human evaluator.

839 FIGURE S4. Frequency distributions of stomatal complex density (SCD), stomatal  
840 complex width (SCW), stomatal complex length (SCL), stomatal complex area (SCA),  
841 stomatal complex total area (SCTA), stomatal complex length to width ratio  
842 (SCLWR), pavement cell density (PD), pavement cell area (PA), pavement cell total  
843 area (PTA), stomatal index (SI), stomatal pore area index (SPI), specific leaf area  
844 (SLA), rate of photosynthetic CO<sub>2</sub> assimilation (*A*), stomatal conductance (*g<sub>s</sub>*), ratio of  
845 leaf intercellular to atmospheric CO<sub>2</sub> concentration (*c<sub>i</sub>/c<sub>a</sub>*) and intrinsic water use  
846 efficiency (*iWUE*) for the maize B73 x MS71 RIL population in grown in 2016 (grey)  
847 and 2017 (yellow). The mean trait values from 2017 for the parent lines MS71  
848 (orange) and B73 (blue) are plotted.

849 FIGURE S5. Correlation matrix for stomatal complex density (SCD), stomatal  
850 complex width (SCW), stomatal complex length (SCL), stomatal complex area (SCA),  
851 stomatal complex total area (SCTA), stomatal complex length to width ratio  
852 (SCLWR), pavement cell density (PD), pavement cell area (PA), pavement cell total  
853 area (PTA), stomatal index (SI), stomatal pore area index (SPI), specific leaf area  
854 (SLA), based on genotype means of the maize B73 x MS71 RIL population grown in  
855 2016 (n = 197). Statistically significant correlations (p<0.05) are highlighted with  
856 colored cells that reflect the strength of the correlation by the size of the shaded area  
857 and are colored from red (positive correlation, coefficient = 1) to blue (negative  
858 correlation, coefficient = -1).

859 FIGURE S6. Sum of percentage of variance explained (PVE) for all QTLs identified  
860 for each trait in 2016 (grey bars) and 2017 (yellow bars). Traits are presented in rank  
861 order from greatest to least sum PVE: stomatal index (SI), stomatal complex area  
862 (SCA), stomatal complex density (SCD), stomatal complex total area (SCTA),  
863 pavement cell area (PA), pavement cell density (PD), stomatal complex width (SCW),  
864 stomatal pore area index (SPI), stomatal complex length to width ratio (SCLWR),  
865 pavement cell total area (PTA), specific leaf area (SLA), stomatal complex length

---

866 (SCL), stomatal conductance ( $g_s$ ), ratio of leaf intercellular to atmospheric CO<sub>2</sub>  
867 concentration ( $c_i/c_a$ ), intrinsic water use efficiency ( $iWUE$ ), rate of photosynthetic  
868 CO<sub>2</sub> assimilation ( $A$ ). Gas exchange traits were only assessed in 2017.

869 FIGURE S7. Examples of input images and the predictions of cell instances made for  
870 them across a range of epidermis morphology and image qualities, including:  
871 pavement cells above veins (where veins are highlighted with arrows; A, B); lower  
872 quality images (C, D), and a darker image (E).

873

874

875

876

877

878

879

880

881

882

883

884

885

886

887

888

889

890

891

892

893

894

895

896

897

898

899



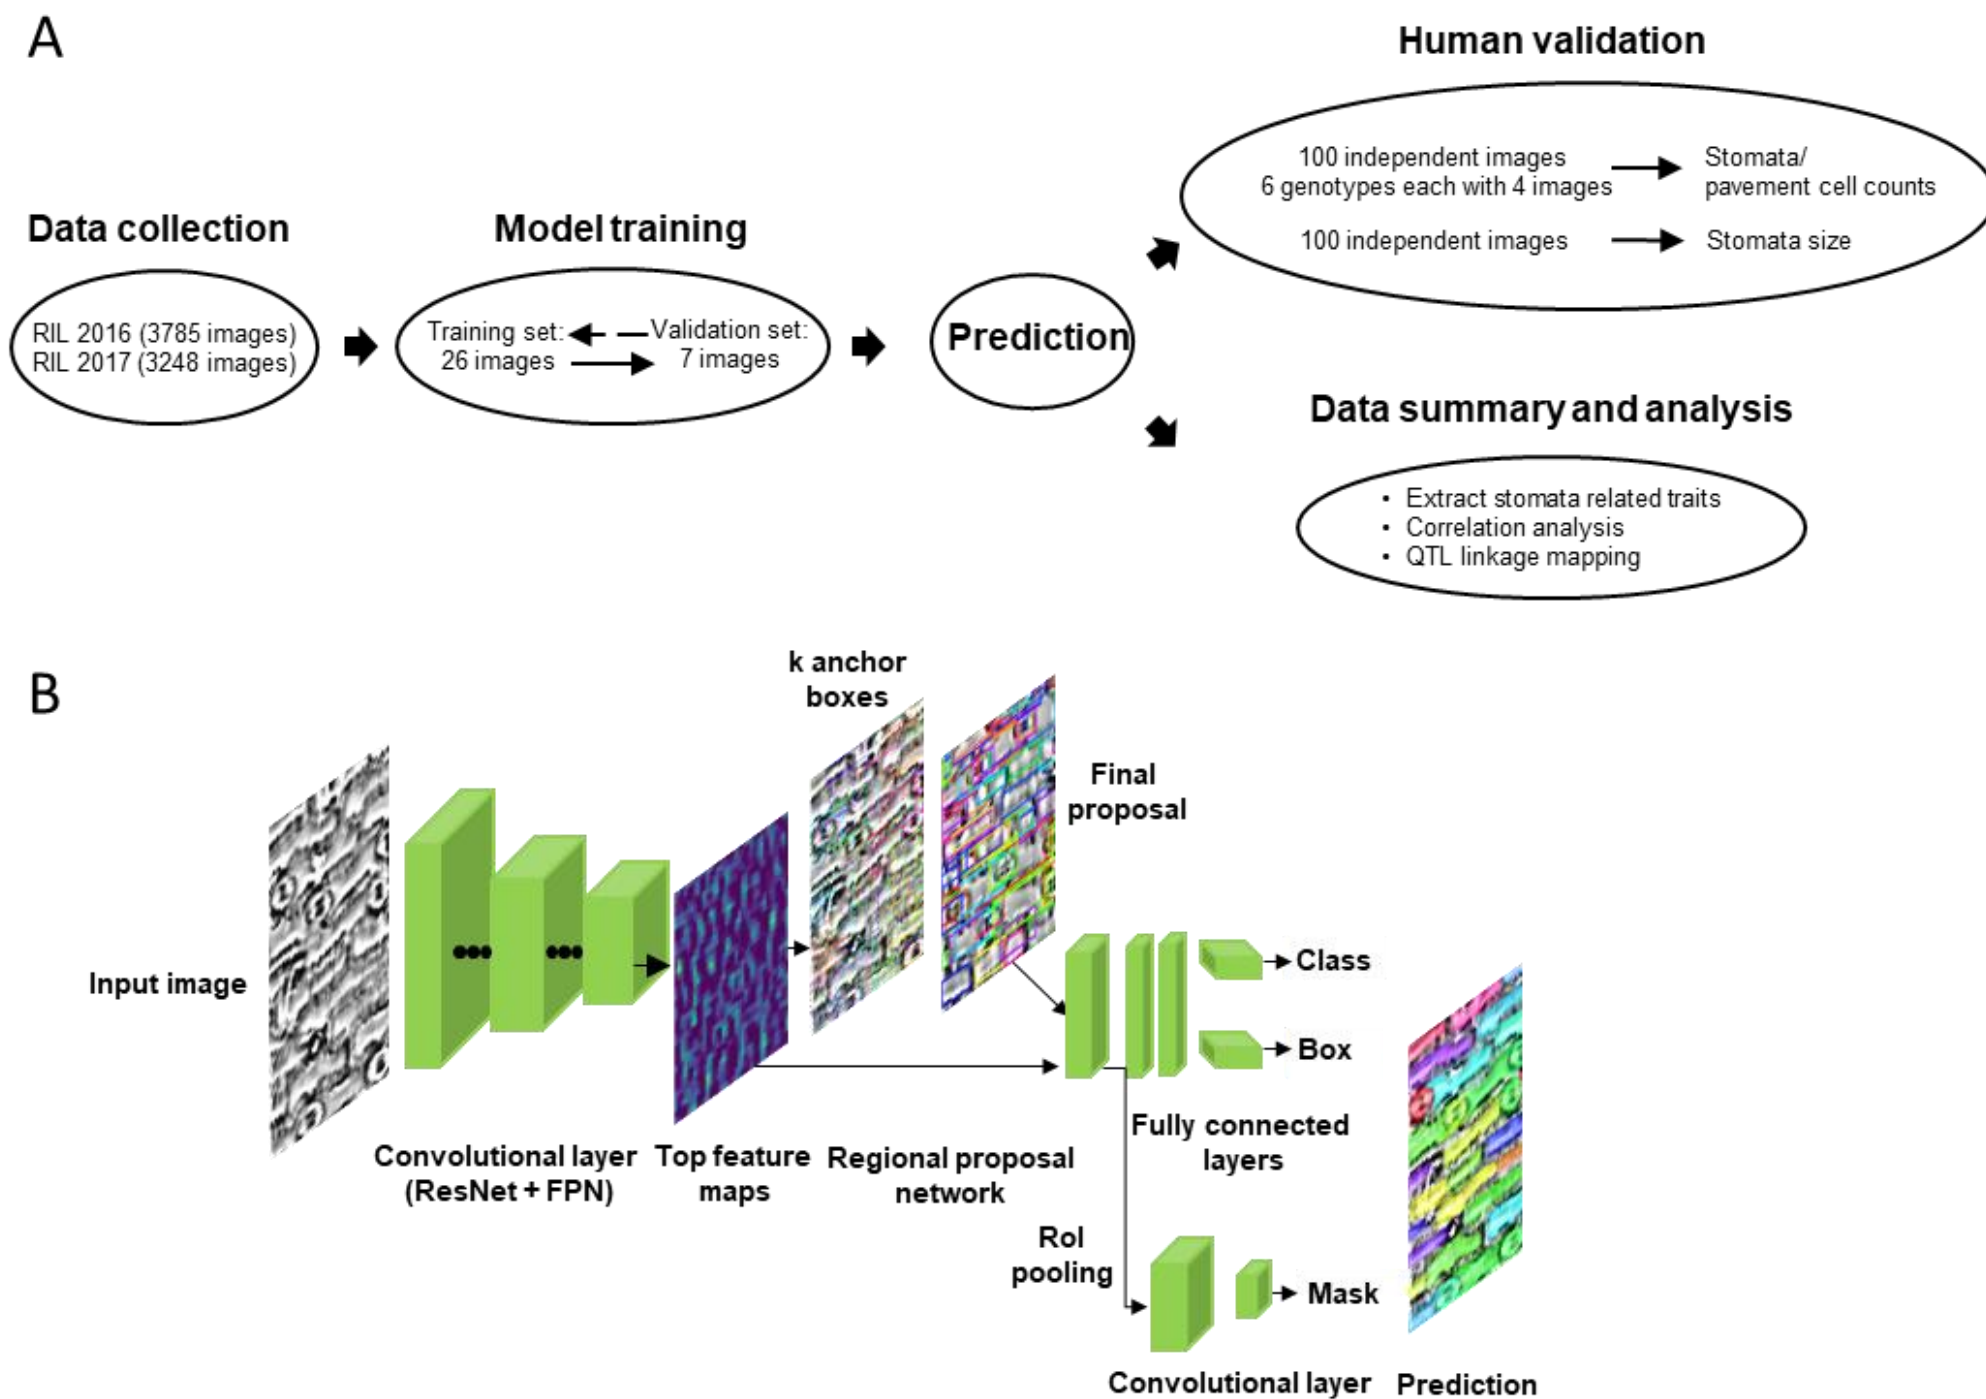

FIGURE 1. Workflow of data collection, model training, model prediction, human validation and experimental data analysis used to phenotype epidermal cell patterning traits (A). Summary of pipeline used by Mask R-CNN to analyze images captured by optical tomography for stomata and pavement cell detection. Image example was truncated from standard image.

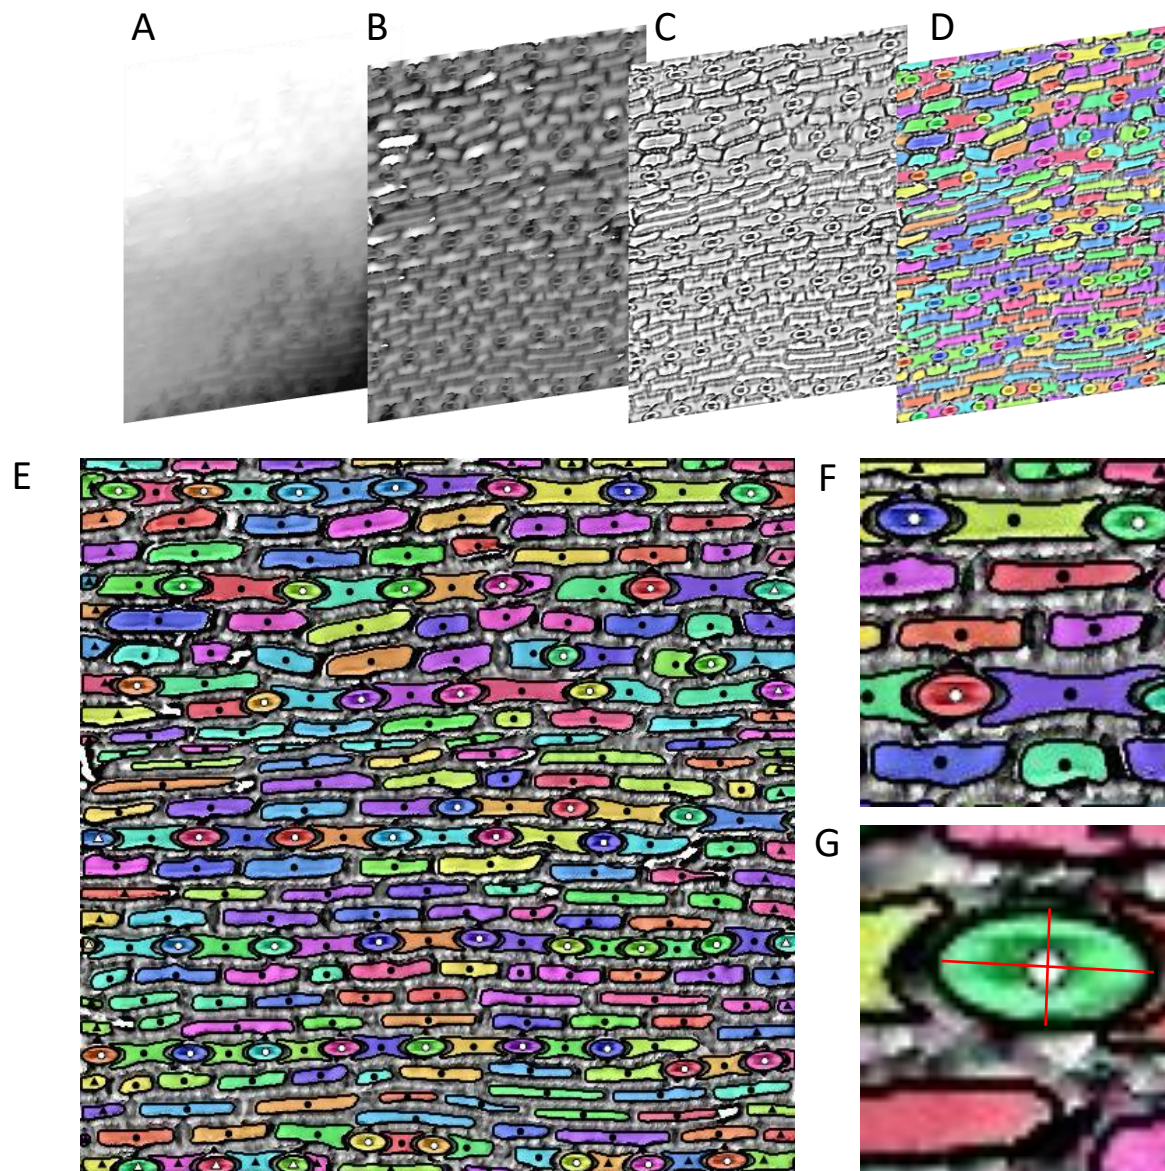

FIGURE 2. Example steps in the process of analyzing an optical tomography image for epidermal cell patterning, including: the 3D topography image layer extracted from raw files output by the optical topometer (A); flattening by use of Robust Gaussian filters (B); contrast enhancement by use of a Laplacian filter (C); prediction of cell instances by Mask R-CNN (D, E, F, G). Cell related traits were calculated and extracted based on cell boundary coordinates, with boundary and centroid labeled for better visualization (E). Zooming in shows stomata were labeled with white centroids while pavement cells were labeled with black centroids (F). Cells that were cut off on image edges were tagged with triangles and were excluded in estimation of average cell size. Ellipses were fit to stomatal complexes, with width and length calculated as the lengths of minor and major axis of the ellipse (red lines; G).

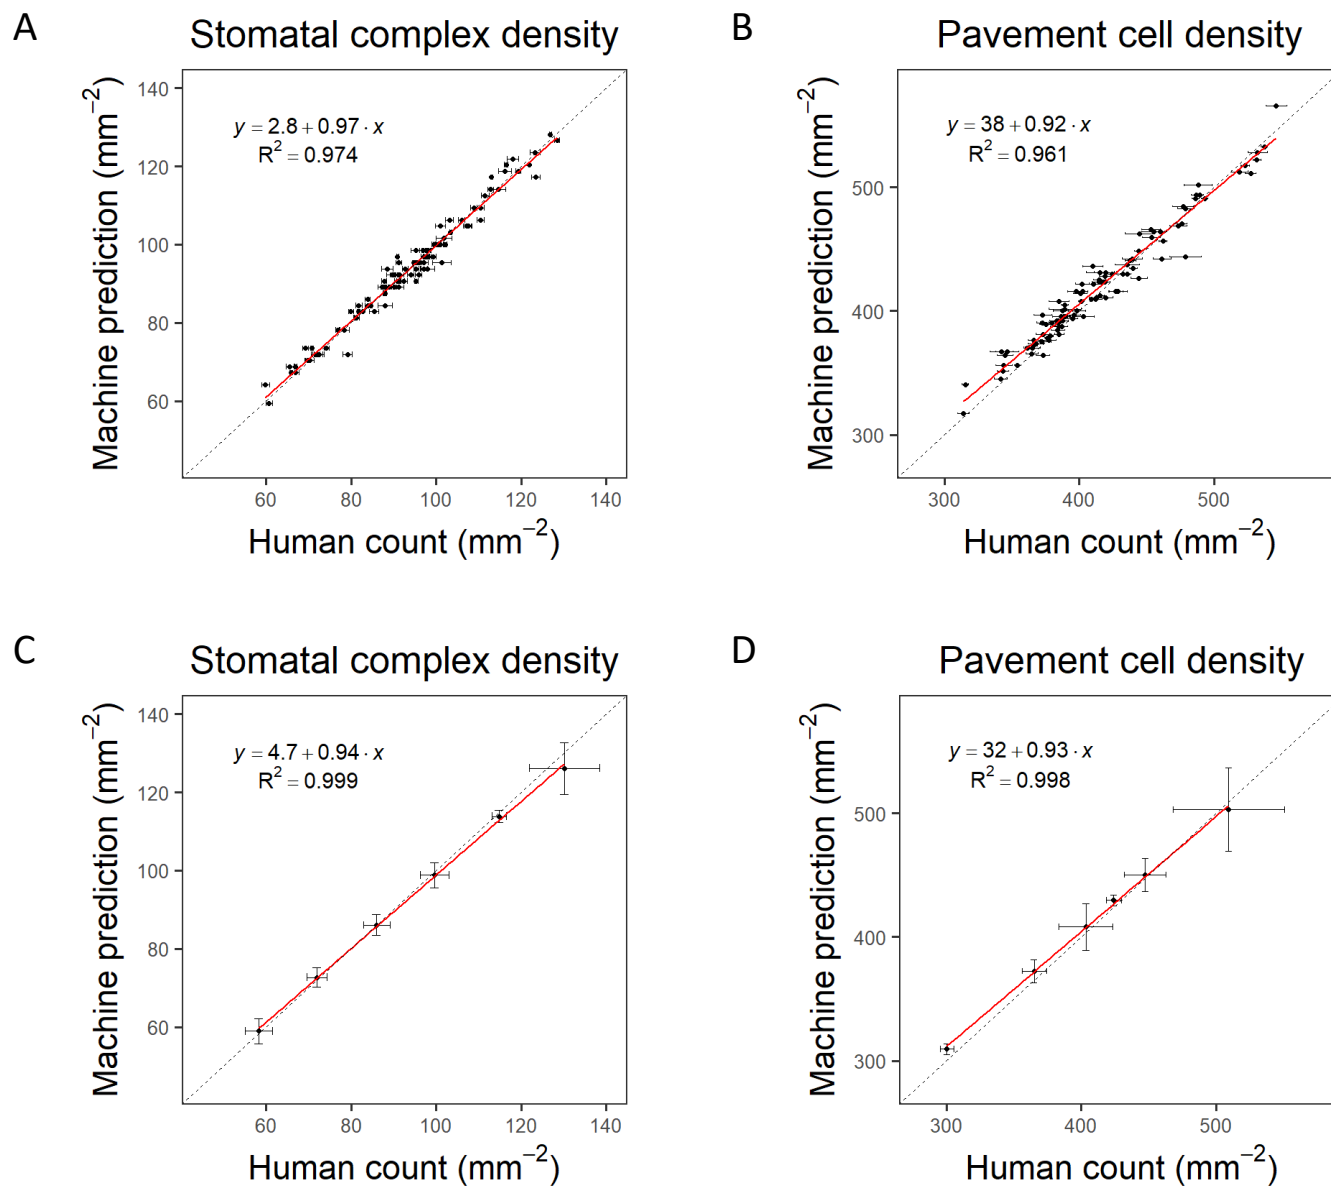

FIGURE 3. Scatterplots of stomatal patterning traits comparing data measured by humans versus data measured by the computer using MASK R-CNN: stomatal complex density (A,C); and pavement cell density (B,D). Plotted data describe 100 randomly selected optical tomography images from the B73 x MS71 maize RIL population with error bars showing the standard error of technical variation among six expert human evaluators on each individual image (A,B) or genotype means for 6 RILs selected to represent the range of observed trait values in the population with error bars showing the standard error of biological variation among replicates based on the mean of predictions from six expert human evaluators or computer predictions using MASK R-CNN (C,D). There is no variance among predictions by MASK R-CNN when it is presented with a given image multiple times. The line of best fit (red line) and 1:1 line (black dashed line) are shown along with the correlation coefficient (r<sup>2</sup>).

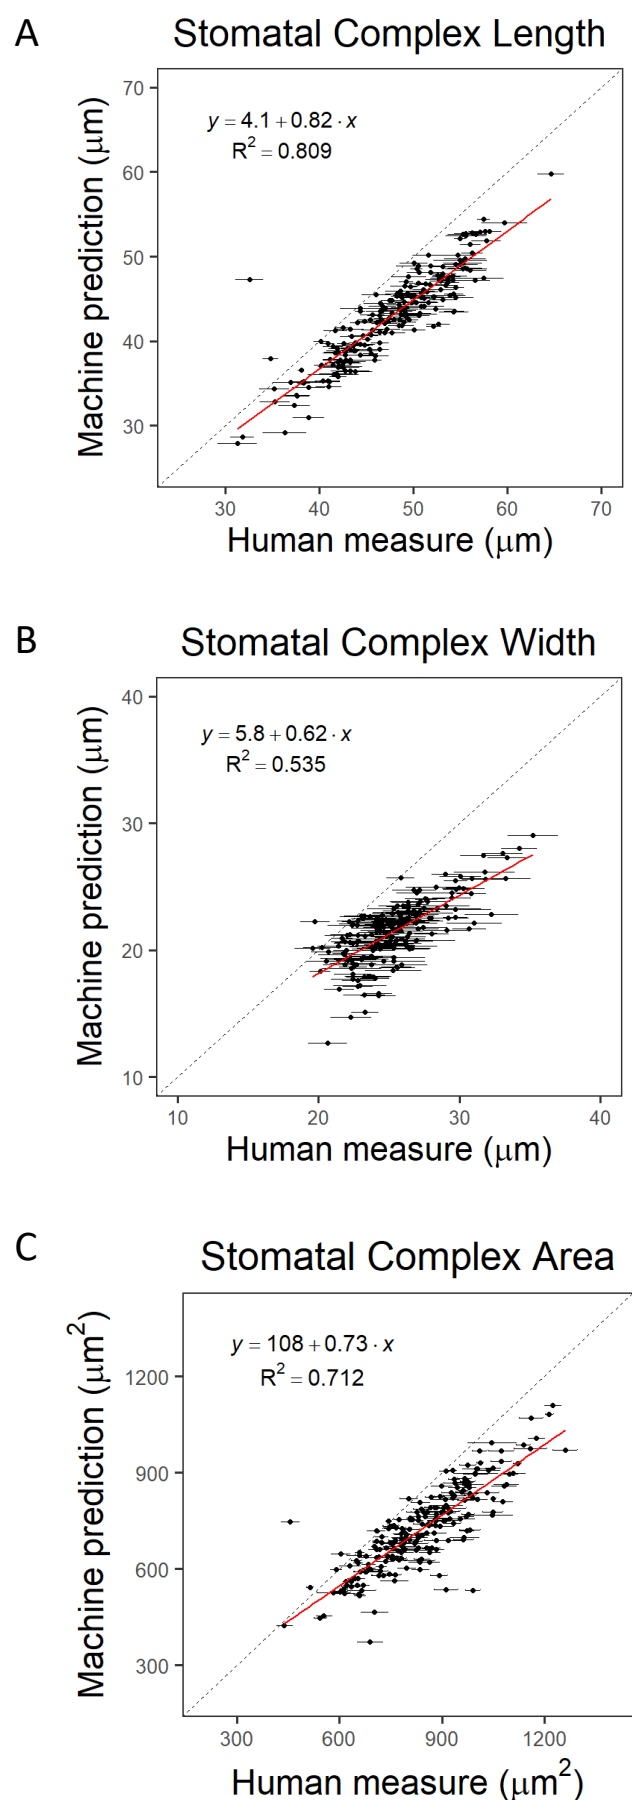

**FIGURE 4.** Scatterplots of stomatal complex length (A), stomatal complex width (B) and stomatal complex area (C) comparing data measured by humans versus data measured by the computer using MASK R-CNN: Plotted data describe 210 stomatal complexes (5 each from 42 images) randomly selected from the B73 x MS71 maize RIL population with error bars showing the standard error of technical variation among six expert human evaluators on each individual image. There is no variance among predictions by MASK R-CNN when it is presented with a given image multiple times. The line of best fit (red line) and 1:1 line (black dashed line) are shown along with the correlation coefficient ( $r^2$ ).

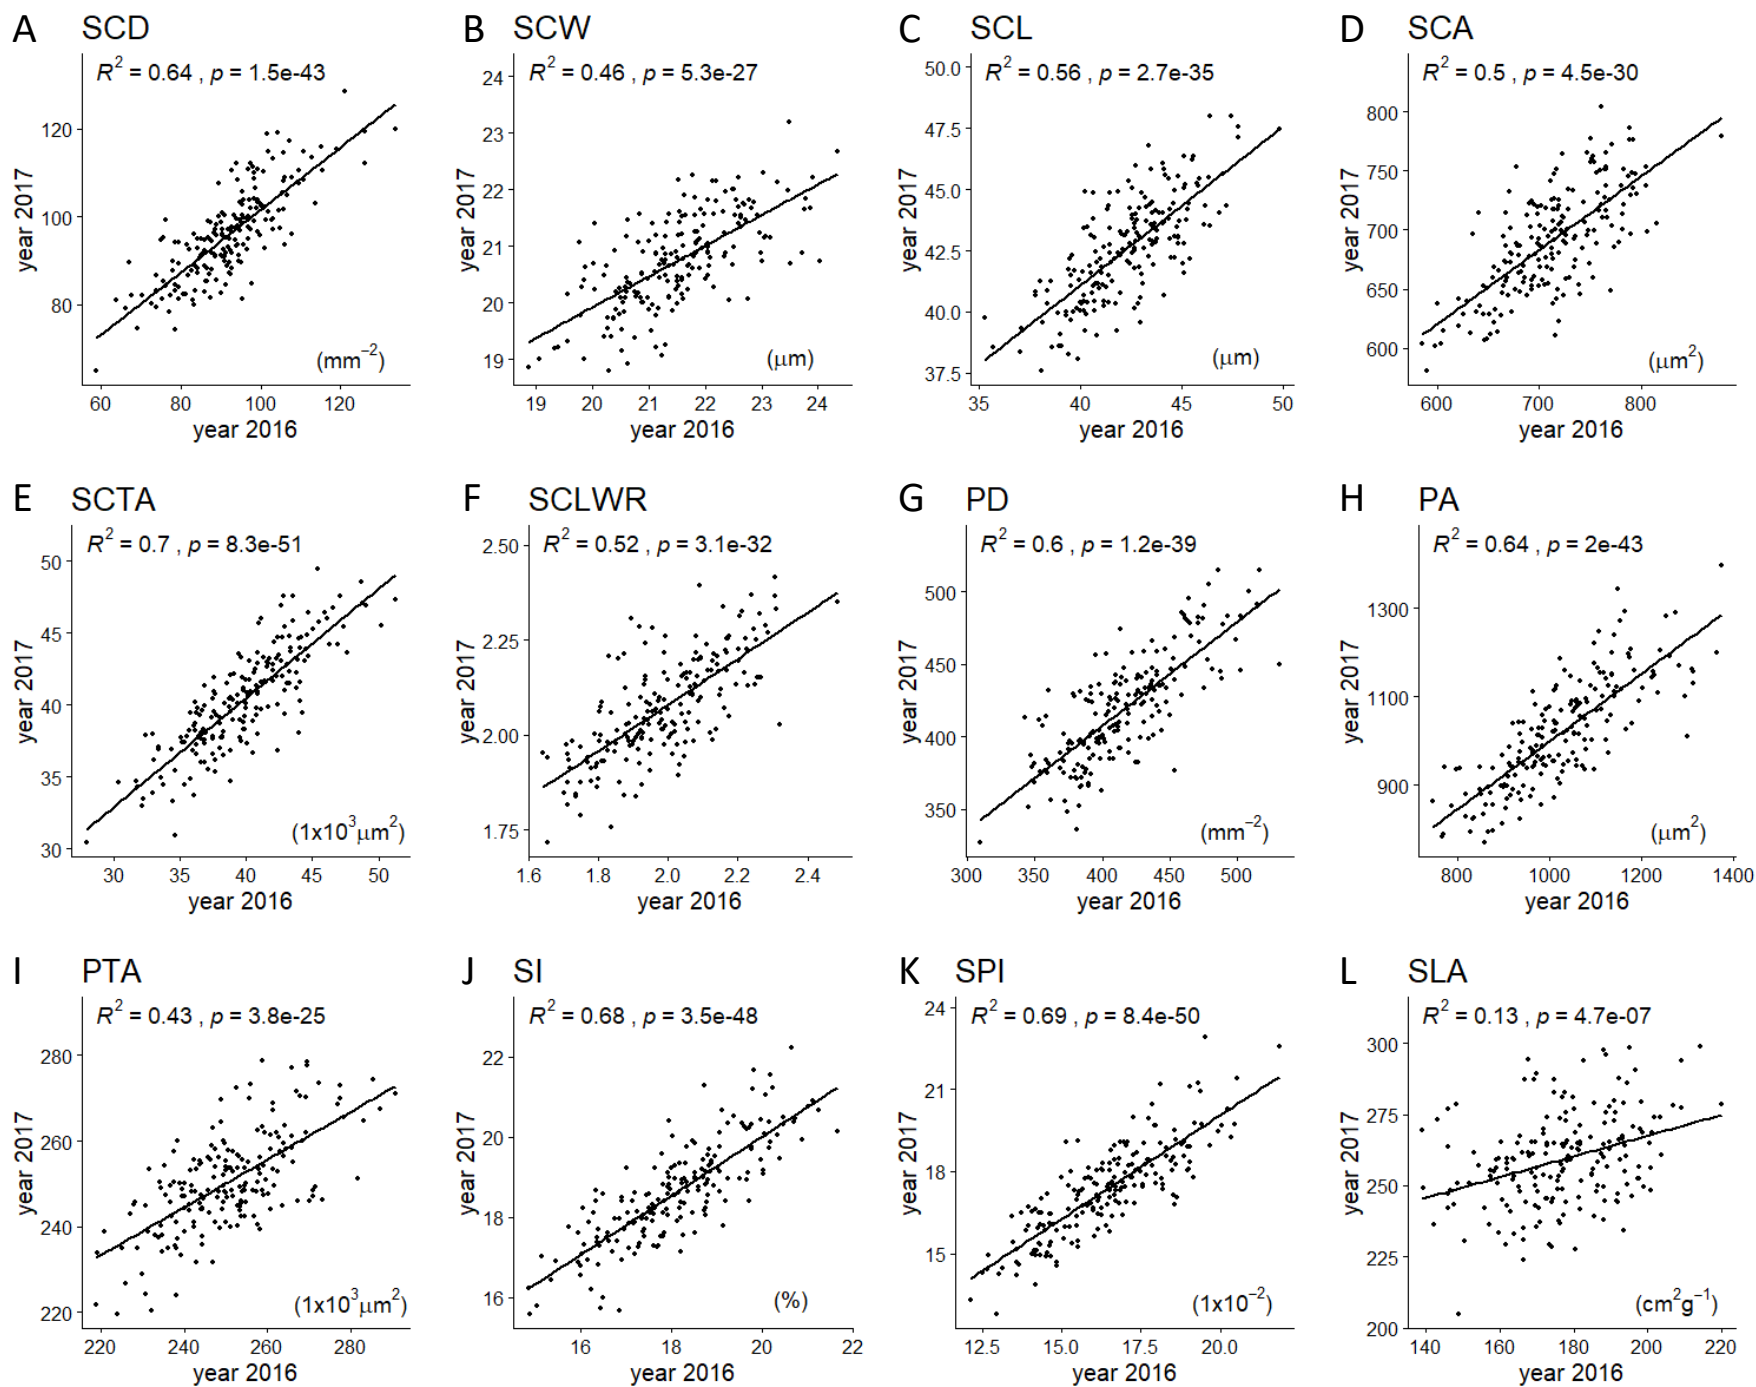

**FIGURE 5.** Scatterplots of stomatal complex density (SCD, A), stomatal complex width (SCW, B), stomatal complex length (SCL, C), stomatal complex area (SCA, D), stomatal complex total area (SCTA, E), stomatal complex length to width ratio (SCLWR, F), pavement cell density (PD, G), pavement cell area (PA, H), pavement cell total area (PTA, I), stomatal index (SI, J), stomatal pore area index (SPI, K), specific leaf area (SLA, L) comparing genotype means for 191 maize B73 x MS71 RILs grown during the 2016 versus 2017 field seasons. The line of best fit (black line), correlation coefficient ( $r^2$ ) and associated p-value are shown.

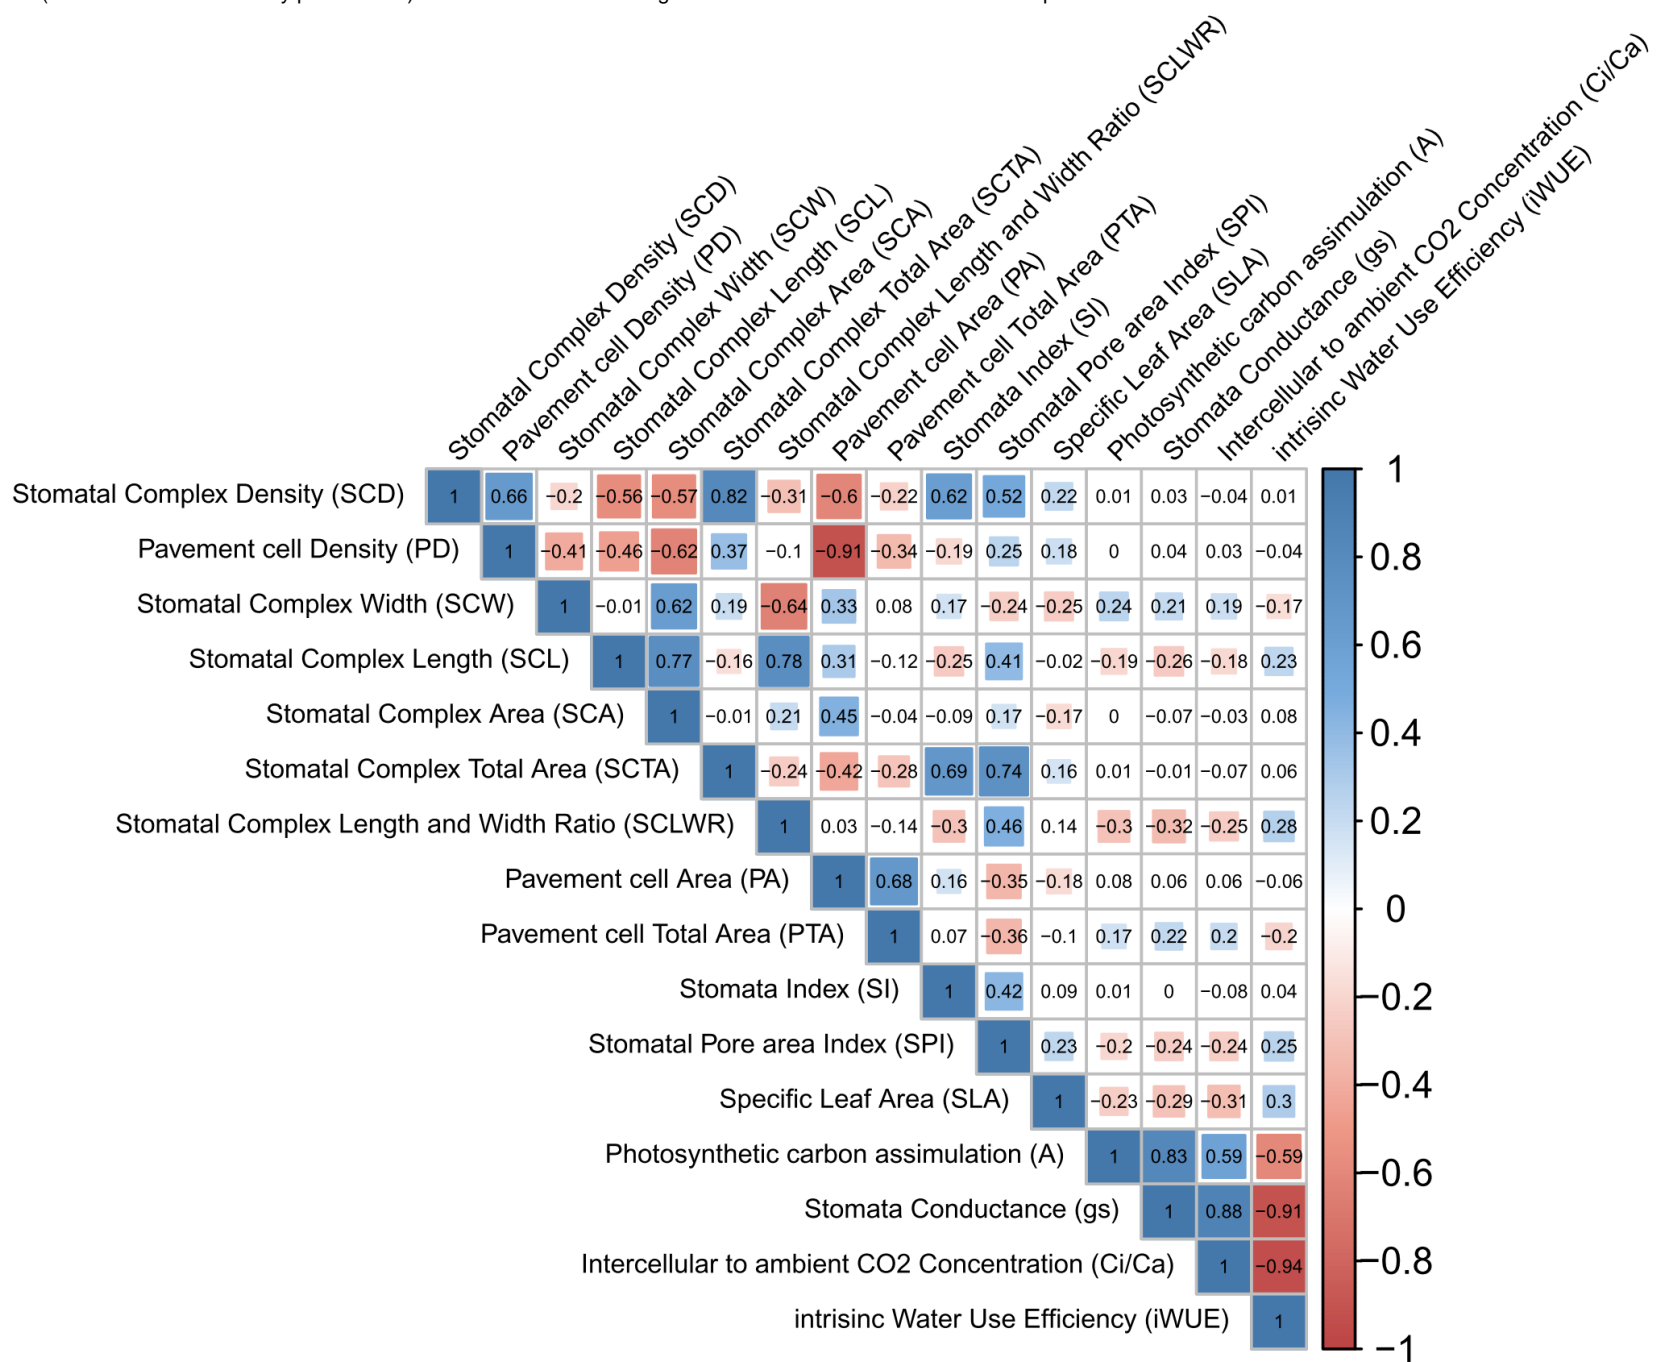

FIGURE 6. Correlation matrix for stomatal complex density (SCD), stomatal complex width (SCW), stomatal complex length (SCL), stomatal complex area (SCA), stomatal complex total area (SCTA), stomatal complex length to width ratio (SCLWR), pavement cell density (PD), pavement cell area (PA), pavement cell total area (PTA), stomatal index (SI), stomatal pore area index (SPI), specific leaf area (SLA), rate of photosynthetic CO<sub>2</sub> assimilation (A), stomatal conductance (g<sub>s</sub>), ratio of leaf intercellular to atmospheric CO<sub>2</sub> concentration (c<sub>i</sub>/c<sub>a</sub>) and intrinsic water use efficiency (iWUE), based on genotype means of the maize B73 x MS71 RIL population grown in 2017 (n = 194). Statistically significant correlations (p<0.05) are highlighted with colored cells that reflect the strength of the correlation by the size of the shaded area and are colored from red (positive correlation, coefficient = 1) to blue (negative correlation, coefficient = -1).

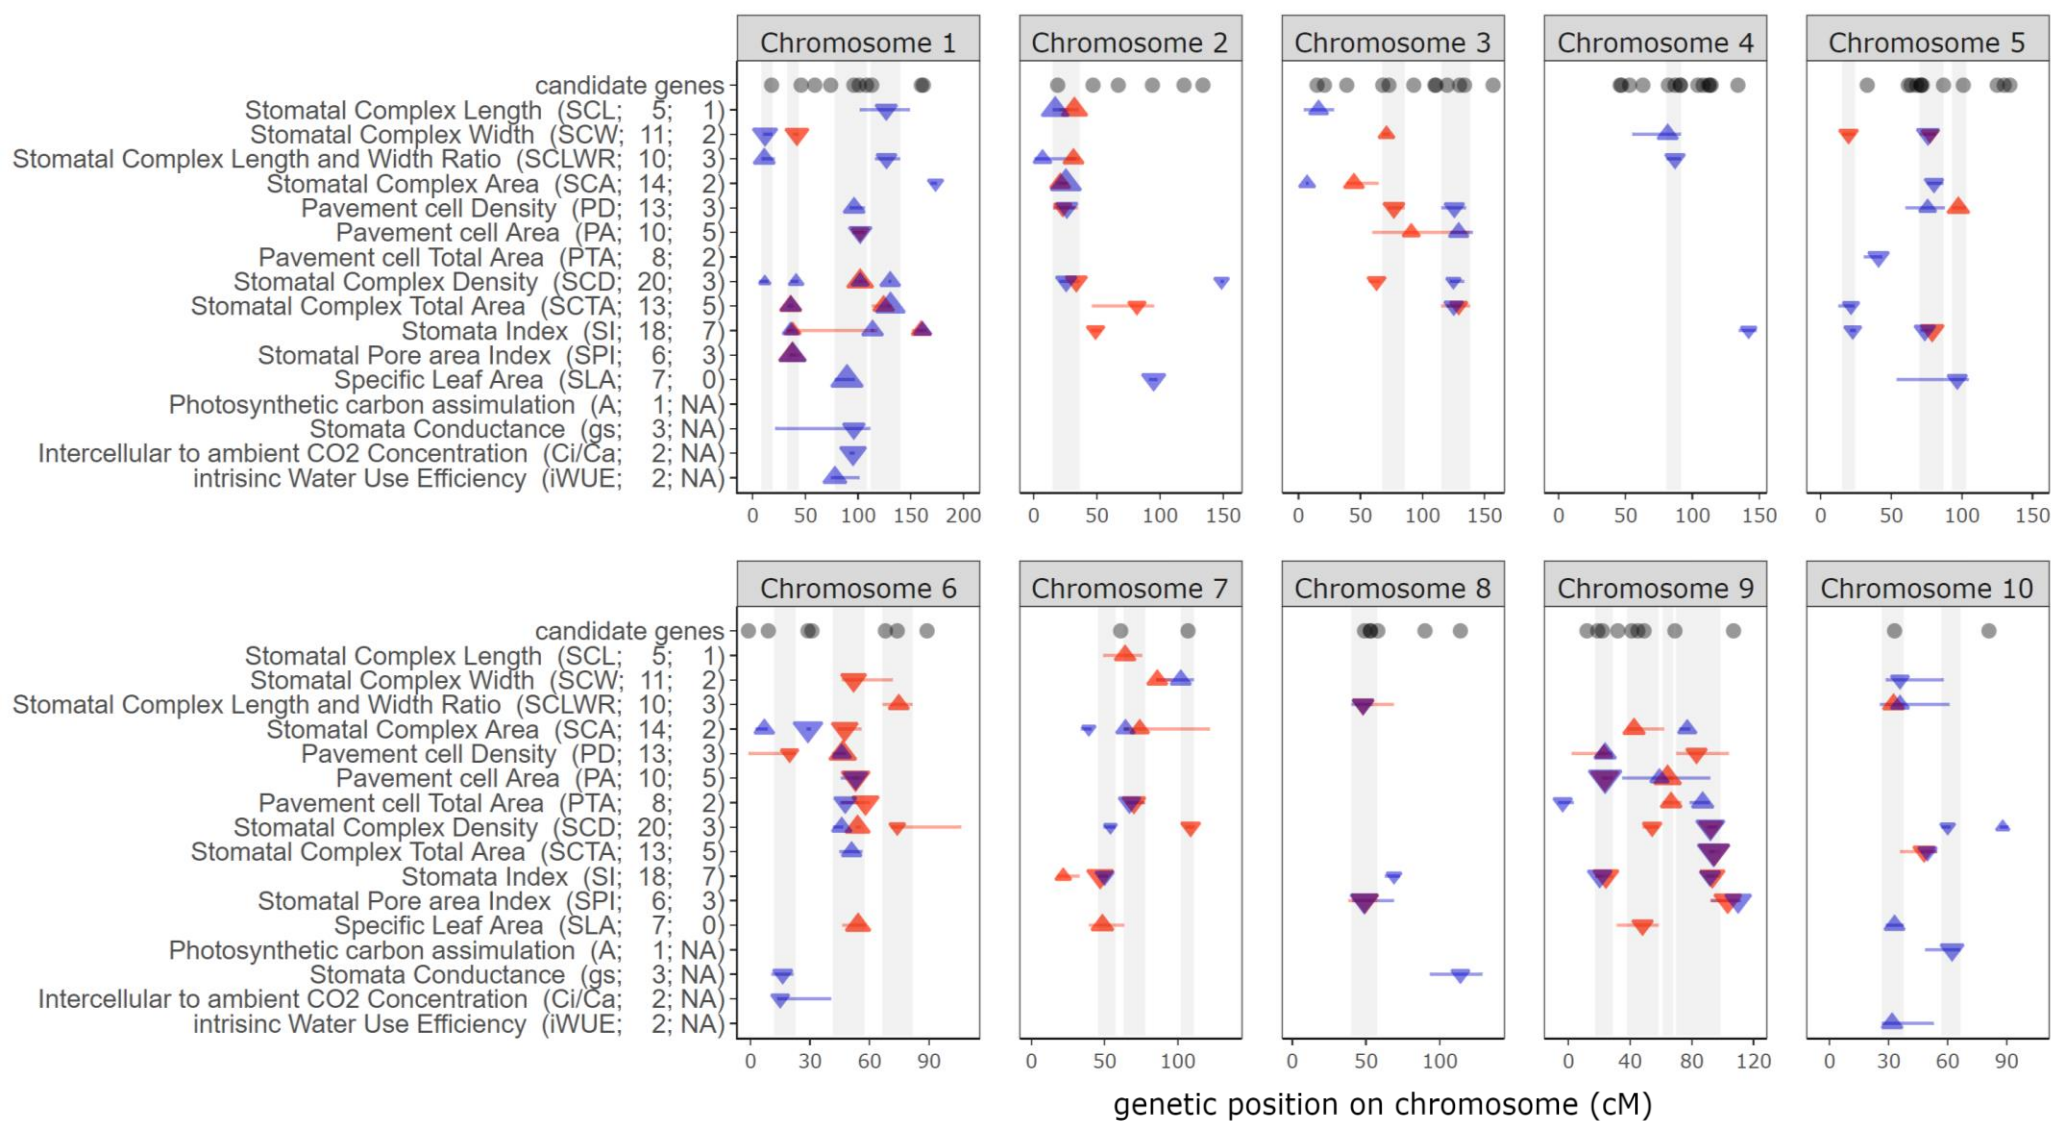

**FIGURE 7.** QTL mapping for stomatal complex density (SCD), stomatal complex width (SCW), stomatal complex length (SCL), stomatal complex area (SCA), stomatal complex total area (SCTA), stomatal complex length to width ratio (SCLWR), pavement cell density (PD), pavement cell area (PA), pavement cell total area (PTA), stomatal index (SI), stomatal pore area index (SPI), specific leaf area (SLA), rate of photosynthetic CO<sub>2</sub> assimilation (A), stomatal conductance (g<sub>s</sub>), ratio of leaf intercellular to atmospheric CO<sub>2</sub> concentration (c<sub>i</sub>/c<sub>a</sub>) and intrinsic water use efficiency (iWUE) from the B73 x MS71 RIL population. Each panel corresponds to an individual chromosome, where the values on the x-axis are chromosome position (cM). Numbers in parentheses following abbreviated trait names on the y-axis indicate the total number of QTL for that trait detected across the two growing seasons and the number of QTL for that trait that were detected consistently across both growing season. Each triangle represents a single QTL detected, with the direction of the arrow corresponding to the directional effect of the MS71 allele. Triangles are colored to indicate QTLs that were significant in 2016 (red), 2017 (blue), or overlapping across both years (purple). Error bars indicate the 1.5 LOD support intervals. Grey shaded areas indicate clusters of co-located QTL. The location of orthologs of known stomatal patterning genes in Arabidopsis are indicated with grey dots.

## Parsed Citations

- Alter RE, Douglas HC, Winter JM, Eltahir EAB (2018) Twentieth Century Regional Climate Change During the Summer in the Central United States Attributed to Agricultural Intensification. *Geophysical Research Letters* 45: 1586–1594**  
Google Scholar: [Author Only](#) [Title Only](#) [Author and Title](#)
- Aono AH, Nagai JS, Dickel SM, Marinho RC (2019) A Stomata Classification and Detection System in Microscope Images of Maize Cultivars. 55: 1–15**  
Google Scholar: [Author Only](#) [Title Only](#) [Author and Title](#)
- Atkinson RRL, Mockford EJ, Bennett C, Christin P-A, Spriggs EL, Freckleton RP, Thompson K, Rees M, Osborne CP (2016) C4 photosynthesis boosts growth by altering physiology, allocation and size. *Nat Plants* 2: 16038**  
Google Scholar: [Author Only](#) [Title Only](#) [Author and Title](#)
- Banan D, Paul RE, Feldman MJ, Holmes MW, Schlake H, Baxter I, Jiang H, Leakey ADB (2018) High-fidelity detection of crop biomass quantitative trait loci from low-cost imaging in the field. *Plant Direct* 2: e00041**  
Google Scholar: [Author Only](#) [Title Only](#) [Author and Title](#)
- Bergmann DC (2004) Integrating signals in stomatal development. *Current Opinion in Plant Biology* 7: 26–32**  
Google Scholar: [Author Only](#) [Title Only](#) [Author and Title](#)
- Bergmann DC, Lukowitz W, Somerville CR (2004) Stomatal development and pattern controlled by a MAPKK kinase. *Science* 304: 1494–1497**  
Google Scholar: [Author Only](#) [Title Only](#) [Author and Title](#)
- Bhugra S, Mishra D, Anupama A, Chaudhury S, Lall B, Chugh A, Chinnusamy V (2019) Deep convolutional neural networks based framework for estimation of stomata density and structure from microscopic images. *Lecture Notes in Computer Science (including subseries Lecture Notes in Artificial Intelligence and Lecture Notes in Bioinformatics)* 11134 LNCS: 412–423**  
Google Scholar: [Author Only](#) [Title Only](#) [Author and Title](#)
- Biscoe TD (1872) The Breathing Pores of Leaves. *The American Naturalist* 6: 129–133**  
Google Scholar: [Author Only](#) [Title Only](#) [Author and Title](#)
- Blatt MR (2000) Cellular Signaling and Volume Control in Stomatal Movements in Plants. *Annual Review of Cell and Developmental Biology* 16: 221–241**  
Google Scholar: [Author Only](#) [Title Only](#) [Author and Title](#)
- Bourdais G, McLachlan DH, Rickett LM, Zhou J, Siwoszek A, Häweker H, Hartley M, Kuhn H, Morris RJ, MacLean D, et al (2019) The use of quantitative imaging to investigate regulators of membrane trafficking in Arabidopsis stomatal closure. *Traffic* 20: 168–180**  
Google Scholar: [Author Only](#) [Title Only](#) [Author and Title](#)
- Broman KW, Wu H, Sen S, Churchill GA (2003) R/qtl: QTL mapping in experimental crosses. *Bioinformatics* 19: 889–890**  
Google Scholar: [Author Only](#) [Title Only](#) [Author and Title](#)
- Buckler ES, Holland JB, Bradbury PJ, Acharya CB, Brown PJ, Browne C, Ersoz E, Flint-Garcia S, Garcia A, Glaubitz JC, et al (2009) The Genetic Architecture of Maize Flowering Time. *Science* 325: 714–718**  
Google Scholar: [Author Only](#) [Title Only](#) [Author and Title](#)
- Caine RS, Yin X, Sloan J, Harrison EL, Mohammed U, Fulton T, Biswal AK, Dionora J, Chater CC, Coe RA, et al (2019) Rice with reduced stomatal density conserves water and has improved drought tolerance under future climate conditions. *New Phytologist* 221: 371–384**  
Google Scholar: [Author Only](#) [Title Only](#) [Author and Title](#)
- Campitelli BE, Marais DLD, Juenger TE (2016) Ecological interactions and the fitness effect of water-use efficiency: Competition and drought alter the impact of natural MPK12 alleles in Arabidopsis. *Ecology Letters* 19: 424–434**  
Google Scholar: [Author Only](#) [Title Only](#) [Author and Title](#)
- Cartwright HN, Humphries JA, Smith LG (2009) PAN1: a receptor-like protein that promotes polarization of an asymmetric cell division in maize. *Science* 323: 649–651**  
Google Scholar: [Author Only](#) [Title Only](#) [Author and Title](#)
- Choquette NE, Ogut F, Wertin TM, Montes CM, Sorgini CA, Morse AM, Brown PJ, Leakey ADB, McIntyre LM, Ainsworth EA (2019) Uncovering hidden genetic variation in photosynthesis of field-grown maize under ozone pollution. *Global Change Biology* 25: 4327–4338**  
Google Scholar: [Author Only](#) [Title Only](#) [Author and Title](#)
- Des Marais DL, Auchincloss LC, Sukantoh E, McKay JK, Logan T, Richards JH, Juenger TE (2014) Variation in MPK12 affects water use efficiency in Arabidopsis and reveals a pleiotropic link between guard cell size and ABA response. *Proceedings of the National Academy of Sciences* 111: 2836–2841**  
Google Scholar: [Author Only](#) [Title Only](#) [Author and Title](#)
- Des Marais DL, Hernandez KM, Juenger TE (2013) Genotype-by-Environment Interaction and Plasticity: Exploring Genomic Responses of Plants to the Abiotic Environment. *Annual Review of Ecology, Evolution, and Systematics* 44: 5–29**  
Google Scholar: [Author Only](#) [Title Only](#) [Author and Title](#)



**Dittberner H, Korte A, Mettler-Altmann T, Weber APM, Monroe G, de Meaux J (2018) Natural variation in stomata size contributes to the local adaptation of water-use efficiency in *Arabidopsis thaliana*. *Molecular Ecology* 27: 4052–4065**

Google Scholar: [Author Only](#) [Title Only](#) [Author and Title](#)

**Dow GJ, Berry JA, Bergmann DC (2014) The physiological importance of developmental mechanisms that enforce proper stomatal spacing in *Arabidopsis thaliana*. *New Phytologist* 201: 1205–1217**

Google Scholar: [Author Only](#) [Title Only](#) [Author and Title](#)

**Duarte KTN, de Carvalho MAG, Martins PS (2017) Segmenting High-quality Digital Images of Stomata using the Wavelet Spot Detection and the Watershed Transform. 540–547**

Google Scholar: [Author Only](#) [Title Only](#) [Author and Title](#)

**Dupuis J, Siegmund D (1999) Statistical Methods for Mapping Quantitative Trait Loci From a Dense Set of Markers. *Genetics* 151: 373–386**

Google Scholar: [Author Only](#) [Title Only](#) [Author and Title](#)

**Dutta A, Zisserman A (2019) The VIA Annotation Software for Images, Audio and Video. *Proceedings of the 27th ACM International Conference on Multimedia*. Association for Computing Machinery, Nice, France, pp 2276–2279**

Google Scholar: [Author Only](#) [Title Only](#) [Author and Title](#)

**Fanourakis D, Giday H, Milla R, Pieruschka R, Kjaer KH, Bolger M, Vasilevski A, Nunes-Nesi A, Fiorani F, Ottosen CO (2015) Pore size regulates operating stomatal conductance, while stomatal densities drive the partitioning of conductance between leaf sides. *Annals of Botany* 115: 555–565**

Google Scholar: [Author Only](#) [Title Only](#) [Author and Title](#)

**Faralli M, Matthews J, Lawson T (2019) Exploiting natural variation and genetic manipulation of stomatal conductance for crop improvement. *Current Opinion in Plant Biology* 49: 1–7**

Google Scholar: [Author Only](#) [Title Only](#) [Author and Title](#)

**Fetter KC, Eberhardt S, Barclay RS, Wing S, Keller SR (2019) StomataCounter: a neural network for automatic stomata identification and counting. *New Phytologist*. doi: 10.1111/nph.15892**

Google Scholar: [Author Only](#) [Title Only](#) [Author and Title](#)

**Franks PJ, Beerling DJ (2009) Maximum leaf conductance driven by CO<sub>2</sub> effects on stomatal size and density over geologic time. *Proceedings of the National Academy of Sciences of the United States of America* 106: 10343–10347**

Google Scholar: [Author Only](#) [Title Only](#) [Author and Title](#)

**Franks PJ, W. Doheny-Adams T, Britton-Harper ZJ, Gray JE (2015) Increasing water-use efficiency directly through genetic manipulation of stomatal density. *New Phytologist* 207: 188–195**

Google Scholar: [Author Only](#) [Title Only](#) [Author and Title](#)

**Głowacka K, Kromdijk J, Kucera K, Xie J, Cavanagh AP, Leonelli L, Leakey ADB, Ort DR, Niyogi KK, Long SP (2018) Photosystem II Subunit S overexpression increases the efficiency of water use in a field-grown crop. *Nature Communications* 9: 868**

Google Scholar: [Author Only](#) [Title Only](#) [Author and Title](#)

**Hara K, Yokoo T, Kajita R, Onishi T, Yahata S, Peterson KM, Torii KU, Kakimoto T (2009) Epidermal cell density is autoregulated via a secretory peptide, EPIDERMAL PATTERNING FACTOR 2 in *Arabidopsis* leaves. *Plant and Cell Physiology* 50: 1019–1031**

Google Scholar: [Author Only](#) [Title Only](#) [Author and Title](#)

**Harrison EL, Cubas LA, Gray JE, Hepworth C (2020) The influence of stomatal morphology and distribution on photosynthetic gas exchange. *The Plant Journal* 101: 768–779**

Google Scholar: [Author Only](#) [Title Only](#) [Author and Title](#)

**Haus MJ, Kelsch RD, Jacobs TW (2015) Application of Optical Topometry to Analysis of the Plant Epidermis. *Plant Physiology*. doi: 10.1104/pp.15.00613**

Google Scholar: [Author Only](#) [Title Only](#) [Author and Title](#)

**Haus MJ, Li M, Chitwood DH, Jacobs TW (2018) Long-Distance and Trans-Generational Stomatal Patterning by CO<sub>2</sub> Across *Arabidopsis* Organs. *Frontiers in Plant Science* 9: 1–11**

Google Scholar: [Author Only](#) [Title Only](#) [Author and Title](#)

**He K, Gkioxari G, Dollar P, Girshick R (2017) Mask R-CNN. *Proceedings of the IEEE International Conference on Computer Vision*. pp 2980–2988**

Google Scholar: [Author Only](#) [Title Only](#) [Author and Title](#)

**Heichel GH (1971) Genetic Control of Epidermal Cell and Stomatal Frequency in Maize 1. *Crop Science* 11: crops1971.0011183X001100060019x**

Google Scholar: [Author Only](#) [Title Only](#) [Author and Title](#)

**Hepworth C, Caine RS, Harrison EL, Sloan J, Gray JE (2018) Stomatal development: focusing on the grasses. *Current Opinion in Plant Biology* 41: 1–7**

Google Scholar: [Author Only](#) [Title Only](#) [Author and Title](#)

- Hervé D, Fabre F, Berrios EF, Leroux N, Chaarani GA, Planchon C, Sarrafi A, Gentzbitte L (2001) QTL analysis of photosynthesis and water status traits in sunflower (*Helianthus annuus* L.) under greenhouse conditions. *J Exp Bot* 52: 1857–1864  
Google Scholar: [Author Only](#) [Title Only](#) [Author and Title](#)
- Hetherington AM, Woodward FI (2003) The role of stomata in sensing and driving environmental change. *Nature* 424: 901–908  
Google Scholar: [Author Only](#) [Title Only](#) [Author and Title](#)
- Higaki T, Kutsuna N, Hasezawa S (2015) CARTA-based semi-automatic detection of stomatal regions on an *Arabidopsis* cotyledon surface. *PLANT MORPHOLOGY* 26: 9–12  
Google Scholar: [Author Only](#) [Title Only](#) [Author and Title](#)
- Hughes J, Hepworth C, Dutton C, Dunn JA, Hunt L, Stephens J, Waugh R, Cameron DD, Gray JE (2017) Reducing Stomatal Density in Barley Improves Drought Tolerance without Impacting on Yield. *Plant Physiology* 174: 776–787  
Google Scholar: [Author Only](#) [Title Only](#) [Author and Title](#)
- Jayakody H, Liu S, Whitty M, Petrie P (2017) Microscope image based fully automated stomata detection and pore measurement method for grapevines. *Plant Methods* 13: 1–12  
Google Scholar: [Author Only](#) [Title Only](#) [Author and Title](#)
- Jiang Y, Li C (2020) Convolutional Neural Networks for Image-Based High-Throughput Plant Phenotyping: A Review. *Plant Phenomics*. doi: <https://doi.org/10.34133/2020/4152816>  
Google Scholar: [Author Only](#) [Title Only](#) [Author and Title](#)
- Jones HG (1977) Transpiration in Barley Lines with Differing Stomatal Frequencies. *J Exp Bot* 28: 162–168  
Google Scholar: [Author Only](#) [Title Only](#) [Author and Title](#)
- Kapanigowda MH, Perumal R, Djanaguiraman M, Aiken RM, Tesso T, Prasad PVV, Little CR (2013) Genotypic variation in sorghum [*Sorghum bicolor* (L.) Moench] exotic germplasm collections for drought and disease tolerance. *SpringerPlus* 2: 650  
Google Scholar: [Author Only](#) [Title Only](#) [Author and Title](#)
- Khazaei H, O'Sullivan DM, Sillanpää MJ, Stoddard FL (2014) Use of synteny to identify candidate genes underlying QTL controlling stomatal traits in faba bean (*Vicia faba* L.). *Theor Appl Genet* 127: 2371–2385  
Google Scholar: [Author Only](#) [Title Only](#) [Author and Title](#)
- Kulya C, L. Siangliw J, Toojinda T, Lontom W, Pattanagul W, Sriyot N, Sanitchon J, Theerakulpisut P (2018) Variation in leaf anatomical characteristics in chromosomal segment substitution lines of KDML105 carrying drought tolerant QTL segments. *ScienceAsia* 44: 197  
Google Scholar: [Author Only](#) [Title Only](#) [Author and Title](#)
- Lampard GR, MacAlister CA, Bergmann DC (2008) *Arabidopsis* Stomatal Initiation Is Controlled by MAPK-Mediated Regulation of the bHLH SPEECHLESS. *Science* 322: 1113–1116  
Google Scholar: [Author Only](#) [Title Only](#) [Author and Title](#)
- Larkin JC, Marks MD, Nadeau J, Sack F (1997) Epidermal cell fate and patterning in leaves. *Plant Cell* 9: 1109–1120  
Google Scholar: [Author Only](#) [Title Only](#) [Author and Title](#)
- Lawson T, Simkin AJ, Kelly G, Granot D (2014) Mesophyll photosynthesis and guard cell metabolism impacts on stomatal behaviour. *New Phytologist* 203: 1064–1081  
Google Scholar: [Author Only](#) [Title Only](#) [Author and Title](#)
- Lawson T, Valet-Chabrand S (2019) Speedy stomata, photosynthesis and plant water use efficiency. *New Phytologist* 221: 93–98  
Google Scholar: [Author Only](#) [Title Only](#) [Author and Title](#)
- Laza MaRC, Kondo M, Ideta O, Barlaan E, Imbe T (2010) Quantitative trait loci for stomatal density and size in lowland rice. *Euphytica* 172: 149–158  
Google Scholar: [Author Only](#) [Title Only](#) [Author and Title](#)
- Leakey ADB, Ferguson JN, Pignon CP, Wu A, Jin Z, Hammer GL, Lobell DB (2019) Water Use Efficiency as a Constraint and Target for Improving the Resilience and Productivity of C 3 and C 4 Crops. *Annual Review of Plant Biology* 70: 781–808  
Google Scholar: [Author Only](#) [Title Only](#) [Author and Title](#)
- Li K, Huang J, Song W, Wang J, Lv S, Wang X (2019) Automatic segmentation and measurement methods of living stomata of plants based on the CV model. *Plant Methods* 15: 67  
Google Scholar: [Author Only](#) [Title Only](#) [Author and Title](#)
- Liao J-X, Chang J, Wang G-X (2005) Stomatal density and gas exchange in six wheat cultivars. *Cereal Research Communications* 33: 719–726  
Google Scholar: [Author Only](#) [Title Only](#) [Author and Title](#)
- Lin T-YY, Zitnick CL, Doll P, Maire M, Belongie S, Hays J, Perona P, Ramanan D, Dollár P, Zitnick CL, et al (2014) Microsoft COCO: Common objects in context. *Lecture Notes in Computer Science (including subseries Lecture Notes in Artificial Intelligence and Lecture Notes in Bioinformatics)*. doi: [10.1007/978-3-319-10602-1\\_48](https://doi.org/10.1007/978-3-319-10602-1_48)  
Google Scholar: [Author Only](#) [Title Only](#) [Author and Title](#)
- Liu S, Tang J, Petrie P, Whitty M (2016) A Fast Method to Measure Stomatal Aperture by MSER on Smart Mobile Phone. p AW2B.2

Google Scholar: [Author Only](#) [Title Only](#) [Author and Title](#)

**Liu X, Fan Y, Mak M, Babla M, Holford P, Wang F, Chen G, Scott G, Wang G, Shabala S, et al (2017) QTLs for stomatal and photosynthetic traits related to salinity tolerance in barley. BMC Genomics 18: 9**

Google Scholar: [Author Only](#) [Title Only](#) [Author and Title](#)

**Liu X, Mak M, Babla M, Wang F, Chen G, Veljanoski F, Wang G, Shabala S, Zhou M, Chen ZH (2014) Linking stomatal traits and expression of slow anion channel genes HvSLAH1 and HvSLAC1 with grain yield for increasing salinity tolerance in barley. Frontiers in Plant Science. doi: 10.3389/fpls.2014.00634**

Google Scholar: [Author Only](#) [Title Only](#) [Author and Title](#)

**Lobell DB, Roberts MJ, Schlenker W, Braun N, Little BB, Rejesus RM, Hammer GL (2014) Greater Sensitivity to Drought Accompanies Maize Yield Increase in the U.S. Midwest. Science 344: 516–519**

Google Scholar: [Author Only](#) [Title Only](#) [Author and Title](#)

**Lynch M, Walsh B (1998) Genetics and Analysis of Quantitative Traits. Sinaure Associates Inc. Sunderland, Massachusetts.**

Google Scholar: [Author Only](#) [Title Only](#) [Author and Title](#)

**USDA (2019) World Agricultural Supply and Demand Estimates(WASDE). Retrieved from <https://www.usda.gov/oce/commodity/wasde/>**

Google Scholar: [Author Only](#) [Title Only](#) [Author and Title](#)

**McAusland L, Viallet-Chabrand S, Davey P, Baker NR, Brendel O, Lawson T (2016) Effects of kinetics of light-induced stomatal responses on photosynthesis and water-use efficiency. New Phytologist 211: 1209–1220**

Google Scholar: [Author Only](#) [Title Only](#) [Author and Title](#)

**McKown KH, Bergmann DC (2020) Stomatal development in the grasses: lessons from models and crops (and crop models). New Phytol nph.16450**

Google Scholar: [Author Only](#) [Title Only](#) [Author and Title](#)

**McMullen MD, Kresovich S, Villeda HS, Bradbury P, Li H, Sun Q, Flint-Garcia S, Thornsberry J, Acharya C, Bottoms C, et al (2009) Genetic properties of the maize nested association mapping population. Science. doi: 10.1126/science.1174320**

Google Scholar: [Author Only](#) [Title Only](#) [Author and Title](#)

**Miskin KE, Rasmusson DC, Moss DN (1972) Inheritance and Physiological Effects of Stomatal Frequency in Barley1. Crop Science 12: crops1972.0011183X001200060019x**

Google Scholar: [Author Only](#) [Title Only](#) [Author and Title](#)

**Mochida K, Koda S, Inoue K, Nishii R (2018) Statistical and Machine Learning Approaches to Predict Gene Regulatory Networks From Transcriptome Datasets. Front Plant Sci. doi: 10.3389/fpls.2018.01770**

Google Scholar: [Author Only](#) [Title Only](#) [Author and Title](#)

**Muchow RC, Sinclair TR (1989) Epidermal conductance, stomatal density and stomatal size among genotypes of Sorghum bicolor (L.) Moench. Plant, Cell & Environment 12: 425–431**

Google Scholar: [Author Only](#) [Title Only](#) [Author and Title](#)

**Ohsumi A, Kanemura T, Homma K, Horie T, Shiraiwa T (2007) Genotypic Variation of Stomatal Conductance in Relation to Stomatal Density and Length in Rice (Oryza sativa L.). Plant Production Science 10: 322–328**

Google Scholar: [Author Only](#) [Title Only](#) [Author and Title](#)

**Omasa K, Onoe M (1984) Measurement of stomatal aperture by digital image processing. Plant and Cell Physiology. doi: 10.1093/oxfordjournals.pcp.a076848**

Google Scholar: [Author Only](#) [Title Only](#) [Author and Title](#)

**Panda D, Mahakhud A, Mohanty B, Mishra SS, Barik J (2018) Genotypic variation of photosynthetic gas exchange and stomatal traits in some traditional rice (Oryza sativa L.) landraces from Koraput, India for crop improvement. Physiol Mol Biol Plants 24: 973–983**

Google Scholar: [Author Only](#) [Title Only](#) [Author and Title](#)

**Patto MCV, Rubiales · D, Martín · A, Hernández · P, Lindhout · P, Niks · R E, Stam · P (2003) QTL mapping provides evidence for lack of association of the avoidance of leaf rust in Hordeum chilense with stomata density. Theor Appl Genet 106: 1283–1292**

Google Scholar: [Author Only](#) [Title Only](#) [Author and Title](#)

**Pelleschi S, Leonardi A, Rocher J-P, Cornic G, de Vienne D, Thévenot C, Prioul J-L (2006) Analysis of the Relationships between Growth, Photosynthesis and Carbohydrate Metabolism Using Quantitative Trait Loci (QTLs) in Young Maize Plants Subjected to Water Deprivation. Mol Breeding 17: 21–39**

Google Scholar: [Author Only](#) [Title Only](#) [Author and Title](#)

**Pieruschka R, Schurr U (2019) Plant Phenotyping: Past, Present, and Future. Plant Phenomics. doi: <https://doi.org/10.34133/2019/7507131>**

Google Scholar: [Author Only](#) [Title Only](#) [Author and Title](#)

**Pillitteri LJ, Peterson KM, Horst RJ, Torii KU (2011) Molecular Profiling of Stomatal Meristemoids Reveals New Component of Asymmetric Cell Division and Commonalities among Stem Cell Populations in Arabidopsis[C][W][OA]. Plant Cell 23: 3260–3275**

Google Scholar: [Author Only](#) [Title Only](#) [Author and Title](#)

Pillitteri LJ, Torii KU (2012) Mechanisms of Stomatal Development. *Annual Review of Plant Biology*. doi: 10.1146/annurev-arplant-042811-105451

Google Scholar: [Author Only](#) [Title Only](#) [Author and Title](#)

Qu X, Yan M, Zou J, Jiang M, Yang K, Le J (2018) A2-type cyclin is required for the asymmetric entry division in rice stomatal development. *Journal of Experimental Botany* 69: 3587–3599

Google Scholar: [Author Only](#) [Title Only](#) [Author and Title](#)

Raissig MT, Abrash E, Bettadapur A, Vogel JP, Bergmann DC (2016) Grasses use an alternatively wired bHLH transcription factor network to establish stomatal identity. *PNAS* 113: 8326–8331

Google Scholar: [Author Only](#) [Title Only](#) [Author and Title](#)

Raissig MT, Matos JL, Gil MXA, Kornfeld A, Bettadapur A, Abrash E, Allison HR, Badgley G, Vogel JP, Berry JA, et al (2017) Mobile MUTE specifies subsidiary cells to build physiologically improved grass stomata. *Science* 355: 1215–1218

Google Scholar: [Author Only](#) [Title Only](#) [Author and Title](#)

Royer DL (2001) Stomatal density and stomatal index as indicators of paleoatmospheric CO<sub>2</sub> concentration. *Review of Palaeobotany and Palynology*. doi: 10.1016/S0034-6667(00)00074-9

Google Scholar: [Author Only](#) [Title Only](#) [Author and Title](#)

Sack L, Cowan PD, Jaikumar N, Holbrook NM (2003) The "hydrology" of leaves: Co-ordination of structure and function in temperate woody species. *Plant, Cell and Environment* 26: 1343–1356

Google Scholar: [Author Only](#) [Title Only](#) [Author and Title](#)

Sakoda K, Watanabe T, Sukemura S, Kobayashi S, Nagasaki Y, Tanaka Y, Shiraiwa T (2019) Genetic Diversity in Stomatal Density among Soybeans Elucidated Using High-throughput Technique Based on an Algorithm for Object Detection. *Sci Rep* 9: 7610

Google Scholar: [Author Only](#) [Title Only](#) [Author and Title](#)

Saponaro P, Treible W, Kolagunda A, Chaya T, Caplan J, Kambhamettu C, Wisser R (2017) DeepXScope: Segmenting Microscopy Images with a Deep Neural Network. *IEEE Computer Society Conference on Computer Vision and Pattern Recognition Workshops 2017-July*: 843–850

Google Scholar: [Author Only](#) [Title Only](#) [Author and Title](#)

Schneider CA, Rasband WS, Eliceiri KW (2012) NIH Image to ImageJ: 25 years of image analysis. *Nature Methods*. doi: 10.1038/nmeth.2089

Google Scholar: [Author Only](#) [Title Only](#) [Author and Title](#)

Schoppach R, Taylor JD, Majerus E, Claverie E, Baumann U, Suchecki R, Fleury D, Sadok W (2016) High resolution mapping of traits related to whole-plant transpiration under increasing evaporative demand in wheat. *J Exp Bot* 67: 2847–2860

Google Scholar: [Author Only](#) [Title Only](#) [Author and Title](#)

Schroeder JI, Allen GJ, Hugouvieux V, Kwak JM, Waner D (2001) Guard Cell Signal Transduction. *Annual Review of Plant Physiology and Plant Molecular Biology* 52: 627–658

Google Scholar: [Author Only](#) [Title Only](#) [Author and Title](#)

Shahinnia F, Le Roy J, Laborde B, Sznajder B, Kalambettu P, Mahjourimajd S, Tilbrook J, Fleury D (2016) Genetic association of stomatal traits and yield in wheat grown in low rainfall environments. *BMC Plant Biology* 16: 150

Google Scholar: [Author Only](#) [Title Only](#) [Author and Title](#)

Singh AK, Ganapathysubramanian B, Sarker S, Singh A (2018) Deep Learning for Plant Stress Phenotyping: Trends and Future Perspectives. *Trends in Plant Science* 23: 883–898

Google Scholar: [Author Only](#) [Title Only](#) [Author and Title](#)

Sumathi M, Bachpai VKW, Deeparaj B, Mayavel A, Dasgupta G, Nagarajan B, Rajasugunasekar D, Sivakumar V, Yasodha R (2018) Quantitative trait loci mapping for stomatal traits in interspecific hybrids of Eucalyptus. *Journal of Genetics* 97: 323–329

Google Scholar: [Author Only](#) [Title Only](#) [Author and Title](#)

Taylor SH, Franks PJ, Hulme SP, Spriggs E, Christin PA, Edwards EJ, Woodward FI, Osborne CP (2012) Photosynthetic pathway and ecological adaptation explain stomatal trait diversity amongst grasses. *New Phytologist* 193: 387–396

Google Scholar: [Author Only](#) [Title Only](#) [Author and Title](#)

Taylor SH, Lowry DB, Aspinwall MJ, Bonnette JE, Fay PA, Juenger TE (2016) QTL and Drought Effects on Leaf Physiology in Lowland *Panicum virgatum*. *Bioenerg Res* 9: 1241–1259

Google Scholar: [Author Only](#) [Title Only](#) [Author and Title](#)

Teng S, Qian Q, Zeng D, Kunihiro Y, Fujimoto K, Huang D, Zhu L (2004) QTL analysis of leaf photosynthetic rate and related physiological traits in rice (*Oryza sativa* L.). *Euphytica* 135: 1–7

Google Scholar: [Author Only](#) [Title Only](#) [Author and Title](#)

Toda Y, Toh S, Bourdais G, Robatzek S, Maclean D, Kinoshita T (2018) DeepStomata: Facial Recognition Technology for Automated Stomatal Aperture Measurement. *bioRxiv* 365098

Google Scholar: [Author Only](#) [Title Only](#) [Author and Title](#)

Torii KU (2015) Stomatal differentiation: the beginning and the end. *Current Opinion in Plant Biology* 28: 16–22

Google Scholar: [Author Only](#) [Title Only](#) [Author and Title](#)

**Tsai H-F, Gajda J, Sloan TFW, Rares A, Shen AQ (2019) Usiigaci: Instance-aware cell tracking in stain-free phase contrast microscopy enabled by machine learning. *SoftwareX* 9: 230–237**

Google Scholar: [Author Only](#) [Title Only](#) [Author and Title](#)

**Ubbens JR, Stavness I (2017) Deep Plant Phenomics: A Deep Learning Platform for Complex Plant Phenotyping Tasks. *Front Plant Sci.* doi: 10.3389/fpls.2017.01190**

Google Scholar: [Author Only](#) [Title Only](#) [Author and Title](#)

**Vanneste S, Coppens F, Lee E, Donner TJ, Xie Z, Van Isterdael G, Dhondt S, De Winter F, De Rybel B, Vuylsteke M, et al (2011) Developmental regulation of CYCA2s contributes to tissue-specific proliferation in Arabidopsis. *EMBO Journal* 30: 3430–3441**

Google Scholar: [Author Only](#) [Title Only](#) [Author and Title](#)

**Violet-Chabrand S, Brendel O (2014) Automatic measurement of stomatal density from microphotographs. *Trees* 28: 1859–1865**

Google Scholar: [Author Only](#) [Title Only](#) [Author and Title](#)

**Vöfély RV, Gallagher J, Pisano GD, Bartlett M, Braybrook SA (2019) Of puzzles and pavements: a quantitative exploration of leaf epidermal cell shape. *New Phytologist* 221: 540–552**

Google Scholar: [Author Only](#) [Title Only](#) [Author and Title](#)

**Wright IJ, Reich PB, Westoby M, Ackerly DD, Baruch Z, Bongers F, Cavender-Bares J, Chapin T, Cornelissen JHC, Diemer M, et al (2004) The worldwide leaf economics spectrum. *Nature* 428: 821–827**

Google Scholar: [Author Only](#) [Title Only](#) [Author and Title](#)

**Wu Z, Chen L, Yu Q, Zhou W, Gou X, Li J, Hou S (2019) Multiple transcriptional factors control stomata development in rice. *New Phytologist* 223: 220–232**

Google Scholar: [Author Only](#) [Title Only](#) [Author and Title](#)

**Yin X, Biswal AK, Dionora J, Perdigon KM, Balahadia CP, Mazumdar S, Chater C, Lin H-C, Coe RA, Kretzschmar T, et al (2017) CRISPR-Cas9 and CRISPR-Cpf1 mediated targeting of a stomatal developmental gene EPFL9 in rice. *Plant Cell Rep* 36: 745–757**

Google Scholar: [Author Only](#) [Title Only](#) [Author and Title](#)

**Yoo CY, Pence HE, Jin JB, Miura K, Gosney MJ, Hasegawa PM, Mickelbart MV (2010) The Arabidopsis GTL1 transcription factor regulates water use efficiency and drought tolerance by modulating stomatal density via transpression of SDD1. *The Plant Cell* 22: 4128–4141**

Google Scholar: [Author Only](#) [Title Only](#) [Author and Title](#)

**Yu J, Holland JB, McMullen MD, Buckler ES (2008) Genetic Design and Statistical Power of Nested Association Mapping in Maize. *Genetics* 178: 539–551**

Google Scholar: [Author Only](#) [Title Only](#) [Author and Title](#)

**Zhang W, Witharana C, Liljedahl AK, Kanevskiy M (2018) Deep convolutional neural networks for automated characterization of arctic ice-wedge polygons in very high spatial resolution aerial imagery. *Remote Sensing*. doi: 10.3390/rs10091487**

Google Scholar: [Author Only](#) [Title Only](#) [Author and Title](#)

**Zheng Y, Xu M, Hou R, Shen R, Qiu S, Ouyang Z (2013) Effects of experimental warming on stomatal traits in leaves of maize (*Zea mays* L.). *Ecology and Evolution* 3: 3095–3111**

Google Scholar: [Author Only](#) [Title Only](#) [Author and Title](#)

**USDA (2020) Foreign Agricultural Service. Retrieved from <https://www.fas.usda.gov/data/grain-world-markets-and-trade>**

Google Scholar: [Author Only](#) [Title Only](#) [Author and Title](#)

**Waleed A (2017) GitHub - matterport/Mask\_RCNN: Mask R-CNN for object detection and instance segmentation on Keras and TensorFlow. [https://github.com/matterport/Mask\\_RCNN](https://github.com/matterport/Mask_RCNN)**

Google Scholar: [Author Only](#) [Title Only](#) [Author and Title](#)
